# Supplementary material for: Laparoscopically assisted versus open oesophagectomy for patients with oesophageal cancer—the Randomised Oesophagectomy: Minimally Invasive or Open (ROMIO) study: protocol for a randomised controlled trial (RCT)
Source: PubMed Central journal article supplement (PMC6887040; doi:10.1136/bmjopen-2019-030907), 2019-11-19
Supplement: bmjopen-2019-030907.draft_revisions.pdf [file bmjopen-2019-030907.draft_revisions.pdf]

# BMJ Open

BMJ Open is committed to open peer review. As part of this commitment we make the peer review history of every article we publish publicly available.

When an article is published we post the peer reviewers' comments and the authors' responses online. We also post the versions of the paper that were used during peer review. These are the versions that the peer review comments apply to.

The versions of the paper that follow are the versions that were submitted during the peer review process. They are not the versions of record or the final published versions. They should not be cited or distributed as the published version of this manuscript.

BMJ Open is an open access journal and the full, final, typeset and author-corrected version of record of the manuscript is available on our site with no access controls, subscription charges or pay-per-view fees (<http://bmjopen.bmj.com>).

If you have any questions on BMJ Open's open peer review process please email [info.bmjopen@bmj.com](mailto:info.bmjopen@bmj.com)

# BMJ Open

## Laparoscopically assisted vs open oesophagectomy for patients with oesophageal cancer – the ROMIO (Randomised Oesophagectomy: Minimally Invasive or Open) study: protocol for a randomized controlled trial (RCT)

|                               |                                                                                                                                                                                                                                                                                                                                                                                                                                                                                                                                                                                                                                                                                                                                                                                                                                                                                                                                                                                                                                                                                                                                                                                                                                                                                                                                                                                                                                                                                                                                                                                                                                                                                                                                                                                                                                                                                                                                                                                                                                                             |
|-------------------------------|-------------------------------------------------------------------------------------------------------------------------------------------------------------------------------------------------------------------------------------------------------------------------------------------------------------------------------------------------------------------------------------------------------------------------------------------------------------------------------------------------------------------------------------------------------------------------------------------------------------------------------------------------------------------------------------------------------------------------------------------------------------------------------------------------------------------------------------------------------------------------------------------------------------------------------------------------------------------------------------------------------------------------------------------------------------------------------------------------------------------------------------------------------------------------------------------------------------------------------------------------------------------------------------------------------------------------------------------------------------------------------------------------------------------------------------------------------------------------------------------------------------------------------------------------------------------------------------------------------------------------------------------------------------------------------------------------------------------------------------------------------------------------------------------------------------------------------------------------------------------------------------------------------------------------------------------------------------------------------------------------------------------------------------------------------------|
| Journal:                      | <i>BMJ Open</i>                                                                                                                                                                                                                                                                                                                                                                                                                                                                                                                                                                                                                                                                                                                                                                                                                                                                                                                                                                                                                                                                                                                                                                                                                                                                                                                                                                                                                                                                                                                                                                                                                                                                                                                                                                                                                                                                                                                                                                                                                                             |
| Manuscript ID                 | bmjopen-2019-030907                                                                                                                                                                                                                                                                                                                                                                                                                                                                                                                                                                                                                                                                                                                                                                                                                                                                                                                                                                                                                                                                                                                                                                                                                                                                                                                                                                                                                                                                                                                                                                                                                                                                                                                                                                                                                                                                                                                                                                                                                                         |
| Article Type:                 | Protocol                                                                                                                                                                                                                                                                                                                                                                                                                                                                                                                                                                                                                                                                                                                                                                                                                                                                                                                                                                                                                                                                                                                                                                                                                                                                                                                                                                                                                                                                                                                                                                                                                                                                                                                                                                                                                                                                                                                                                                                                                                                    |
| Date Submitted by the Author: | 11-Apr-2019                                                                                                                                                                                                                                                                                                                                                                                                                                                                                                                                                                                                                                                                                                                                                                                                                                                                                                                                                                                                                                                                                                                                                                                                                                                                                                                                                                                                                                                                                                                                                                                                                                                                                                                                                                                                                                                                                                                                                                                                                                                 |
| Complete List of Authors:     | <p>Brierley, Rachel; University of Bristol<br/> Gaunt, Daisy; University of Bristol Faculty of Medicine and Dentistry, Bristol Randomised Trials Collaboration &amp; School of Social and Community Medicine; University of Bristol<br/> Metcalfe, Chris; University of Bristol, Social Medicine<br/> Blazeby, Jane; University of Bristol, Department of Social Medicine<br/> Blencowe, Natalie; University of Bristol, Centre for Surgical Research, School of Social and Community Medicine<br/> Jepson, Marcus; University of Bristol School of Social and Community Medicine,<br/> Berrisford, Richard G.; Derriford Hospital, Upper GI Surgery<br/> Avery, Kerry; University of Bristol, School of Social and Community Medicine<br/> Hollingworth, William; University of Bristol, School of Social and Community Medicine<br/> Rice, Caoimhe; University of Bristol, School of Social and Community Medicine<br/> Moire-Fernandez, Aide; University of Bristol<br/> Wong, Newton; Department of Cellular Pathology, North Bristol NHS Trust, Southmead Hospital,<br/> Nicklin, Joanna; University hospitals Bristol NHS Foundation Trust,<br/> Skilton, Anni; University of Bristol<br/> Boddy, Alex; Leicester Royal Infirmary<br/> Byrne, James; University Hospital Southampton, Division of Surgery, University Hospital Southampton NHS Foundation Trust, Tremona Road, Southampton, Hampshire, SO16 6YD<br/> Underwood, Tim; University Hospital Southampton, Division of Surgery, University Hospital Southampton NHS Foundation Trust, Tremona Road, Southampton, Hampshire, SO16 6YD<br/> Vohra, Ravi; Nottingham City Hospital<br/> Catton, James; Nottingham City Hospital<br/> Pursnani, Kish; Royal Preston Hospital<br/> Melhado, Rachel; Salford Royal NHS Foundation Trust<br/> Alkhaffaf, Bilal; Manchester University NHS Foundation Trust, Department of Oesophago-Gastric Surgery<br/> Krysztopik, Richard; Royal United Hospital Bath NHS Trust<br/> Lamb, Peter; Royal Infirmary of Edinburgh, General Surgery Department</p> |

|           |                                                                                                                                                                                                                                                                                                                                                                                                                                                                                                                                                                                                                                                                                                                                                                                                                                                                                                                                                                                                                                                                                                                                                                                                                                                                                                                                                                                                                                                                                                                                                                                                                                                                                                                                                                                                                                                                                                                                                                                                                                                                                                                                                                                                                                                                                                                                                                                                                                                                                                                                                                                                                                                                                                                                                                                                                                                                                                                                                                                                                                                                                                                                                                                                                                                                                                                           |
|-----------|---------------------------------------------------------------------------------------------------------------------------------------------------------------------------------------------------------------------------------------------------------------------------------------------------------------------------------------------------------------------------------------------------------------------------------------------------------------------------------------------------------------------------------------------------------------------------------------------------------------------------------------------------------------------------------------------------------------------------------------------------------------------------------------------------------------------------------------------------------------------------------------------------------------------------------------------------------------------------------------------------------------------------------------------------------------------------------------------------------------------------------------------------------------------------------------------------------------------------------------------------------------------------------------------------------------------------------------------------------------------------------------------------------------------------------------------------------------------------------------------------------------------------------------------------------------------------------------------------------------------------------------------------------------------------------------------------------------------------------------------------------------------------------------------------------------------------------------------------------------------------------------------------------------------------------------------------------------------------------------------------------------------------------------------------------------------------------------------------------------------------------------------------------------------------------------------------------------------------------------------------------------------------------------------------------------------------------------------------------------------------------------------------------------------------------------------------------------------------------------------------------------------------------------------------------------------------------------------------------------------------------------------------------------------------------------------------------------------------------------------------------------------------------------------------------------------------------------------------------------------------------------------------------------------------------------------------------------------------------------------------------------------------------------------------------------------------------------------------------------------------------------------------------------------------------------------------------------------------------------------------------------------------------------------------------------------------|
|           | <p>Culliford, Lucy; University of Bristol, Bristol Heart Institute, Rogers, Chris; university of bristol, Clinical Science South Bristol<br/>         Howes, Ben; University of Bristol, Anesthetics<br/>         Chalmers, Katy; University of Bristol<br/>         Cousins, Sian; University of Bristol, Population Health Sciences<br/>         Elliott, Jackie<br/>         Donovan, Jenny; University of Bristol<br/>         Heys, Rachael; University of Bristol<br/>         Wickens, Robin; University of Bristol<br/>         wilkerson, paul; University Hospitals Bristol NHS Foundation Trust<br/>         Hollowood, Andrew; University Hospitals Bristol NHS Foundation Trust<br/>         streets, christopher; University Hospitals Bristol NHS Foundation Trust<br/>         titcomb, dan; University Hospitals Bristol NHS Foundation Trust<br/>         humphreys, lee; Derriford Hospital, Upper GI Surgery<br/>         wheatley, tim; Derriford Hospital, Upper GI Surgery<br/>         sanders, Grant; Derriford Hospital, Upper GI Surgery<br/>         ariyathenam, arun; Derriford Hospital, Upper GI Surgery<br/>         kelly, jamie; University Hospital Southampton, Division of Surgery, University Hospital Southampton NHS Foundation Trust, Tremona Road, Southampton, Hampshire, SO16 6YD<br/>         noble, fergus; University Hospital Southampton, Division of Surgery, University Hospital Southampton NHS Foundation Trust, Tremona Road, Southampton, Hampshire, SO16 6YD<br/>         couper, graeme; Royal Infirmary of Edinburgh, General Surgery Department<br/>         skipworth, richard; Royal Infirmary of Edinburgh, General Surgery Department<br/>         deans, chris; Royal Infirmary of Edinburgh, General Surgery Department<br/>         ubhi, sukhbir; Leicester Royal Infirmary<br/>         Williams, R; Leicester Royal Infirmary<br/>         bowrey, david; Leicester Royal Infirmary<br/>         exon, david; Leicester Royal Infirmary<br/>         turner, paul; Royal Preston Hospital<br/>         daya shetty, vinutha; Royal Preston Hospital<br/>         chaparala, ram; Salford Royal NHS Foundation Trust<br/>         akhtar, khurshid; Salford Royal NHS Foundation Trust<br/>         farooq, naheed; Salford Royal NHS Foundation Trust<br/>         Parsons, Simon; Nottingham University Hospitals NHS Trust, Department of General Surgery<br/>         welch, neil; Nottingham City Hospital<br/>         Houlihan, Rebecca; University Hospitals Bristol NHS Foundation Trust<br/>         Smith, Jo; Derriford Hospital, Upper GI Surgery<br/>         Schranz, Rachel; University Hospital Southampton, Division of Surgery, University Hospital Southampton NHS Foundation Trust, Tremona Road, Southampton, Hampshire, SO16 6YD<br/>         rea, nicola; Royal Infirmary of Edinburgh, General Surgery Department<br/>         cooke, jill; Leicester Royal Infirmary<br/>         williams, alexandra; Royal Preston Hospital<br/>         hindmarsh, Carolyn; Salford Royal NHS Foundation Trust<br/>         maitland, sally; Nottingham City Hospital<br/>         howie, lucy; Royal United Hospital Bath NHS Trust<br/>         Barham, C; University Hospitals Bristol NHS Foundation Trust, Division of Surgery</p> |
| Keywords: | oesophageal cancer, oesophagectomy, quality of life, randomised controlled trial, minimally invasive oesophagectomy                                                                                                                                                                                                                                                                                                                                                                                                                                                                                                                                                                                                                                                                                                                                                                                                                                                                                                                                                                                                                                                                                                                                                                                                                                                                                                                                                                                                                                                                                                                                                                                                                                                                                                                                                                                                                                                                                                                                                                                                                                                                                                                                                                                                                                                                                                                                                                                                                                                                                                                                                                                                                                                                                                                                                                                                                                                                                                                                                                                                                                                                                                                                                                                                       |
|           |                                                                                                                                                                                                                                                                                                                                                                                                                                                                                                                                                                                                                                                                                                                                                                                                                                                                                                                                                                                                                                                                                                                                                                                                                                                                                                                                                                                                                                                                                                                                                                                                                                                                                                                                                                                                                                                                                                                                                                                                                                                                                                                                                                                                                                                                                                                                                                                                                                                                                                                                                                                                                                                                                                                                                                                                                                                                                                                                                                                                                                                                                                                                                                                                                                                                                                                           |

SCHOLARONE™  
Manuscripts

1  
2  
3  
4  
5  
6  
7  
8  
9  
10  
11  
12  
13  
14  
15  
16  
17  
18  
19  
20  
21  
22  
23  
24  
25  
26  
27  
28  
29  
30  
31  
32  
33  
34  
35  
36  
37  
38  
39  
40  
41  
42  
43  
44  
45  
46  
47  
48  
49  
50  
51  
52  
53  
54  
55  
56  
57  
58  
59  
60

# Laparoscopically assisted vs open oesophagectomy for patients with oesophageal cancer – the ROMIO (Randomised Oesophagectomy: Minimally Invasive or Open) study: protocol for a randomized controlled trial (RCT)

Rachel C Brierley<sup>1</sup>, Daisy M Gaunt<sup>2</sup>, Chris Metcalfe<sup>2</sup>, Jane M Blazeby<sup>3,4</sup>, Natalie S Blencowe<sup>3,4</sup>, Marcus Jepson<sup>3</sup>, Richard Berrisford<sup>5</sup>, Kerry N L Avery<sup>3</sup>, William Hollingworth<sup>6</sup>, Caoimhe T Rice<sup>2,6</sup>, Aida Moure-Fernandez<sup>6</sup>, Newton Wong<sup>7</sup>, Joanna Nicklin<sup>4</sup>, Anni Skilton<sup>3</sup>, Alex Boddy<sup>8</sup>, James Byrne<sup>9</sup>, Tim Underwood<sup>9</sup>, Ravi Vohra<sup>10</sup>, James A. Catton<sup>10</sup>, Kish Pursnani<sup>11</sup>, Rachel Melhado<sup>12</sup>, Bilal Alkhaffaf<sup>12</sup>, Richard Krysztopik<sup>13</sup>, Peter Lamb<sup>14</sup>, Lucy Culliford<sup>1</sup>, Chris Rogers<sup>1</sup>, Benjamin Howes<sup>15</sup>, Katy Chalmers<sup>3</sup>, Sian Cousins<sup>3</sup>, Jackie Elliott, Jenny Donovan<sup>3</sup>, Rachael Heys<sup>1</sup>, Robin A Wickens<sup>1</sup>, Paul Wilkerson<sup>4</sup>, Andrew Hollowood<sup>4</sup>, Christopher Streets<sup>4</sup>, Dan Titcomb<sup>4</sup>, M Lee Humphreys<sup>5</sup>, Tim Wheatley<sup>5</sup>, Grant Sanders<sup>5</sup>, Arun Ariyathenam<sup>5</sup>, Jamie Kelly<sup>8</sup>, Fergus Noble<sup>8</sup>, Graeme Couper<sup>9</sup>, Richard J. E. Skipworth<sup>9</sup>, Chris Deans<sup>9</sup>, Sukhbir Ubhi<sup>10</sup>, Rob Williams<sup>10</sup>, David Bowrey<sup>10</sup>, David Exon<sup>10</sup>, Paul Turner<sup>11</sup>, Vinutha Shetty<sup>11</sup>, Ram Chaparala<sup>12</sup>, Khurshid Akhtar<sup>12</sup>, Naheed Farooq<sup>12</sup>, Simon L. Parsons<sup>13</sup>, Neil T Welch<sup>13</sup>, Rebecca J Houlihan<sup>4</sup>, Joanne Smith<sup>5</sup>, Rachel Schranz<sup>8</sup>, Nicola Rea<sup>9</sup>, Jill Cooke<sup>10</sup>, Alexandra Williams<sup>11</sup>, Carolyn Hindmarsh<sup>12</sup>, Sally Maitland<sup>13</sup>, Lucy Howie<sup>14</sup>, C Paul Barham<sup>4</sup>

## *Affiliations:*

1. Clinical Trials and Evaluation Unit, Bristol Trials Centre, University of Bristol, University Hospitals Bristol NHS Foundation Trust, Bristol, UK
2. Bristol Randomised Trials Collaboration, Bristol Trials Centre, University of Bristol, Bristol, UK
3. Centre for Surgical Research, Population Health Sciences, Bristol Medical School, Bristol, UK
4. Division of Surgery, University Hospitals Bristol NHS Foundation Trust, Bristol, UK
5. Department of Upper Gastrointestinal Surgery, Derriford Hospital, University Hospitals Plymouth NHS Trust, Plymouth, UK
6. Health Economics Bristol, Bristol Medical School, University of Bristol, Bristol, UK
7. Department of Cellular Pathology, North Bristol NHS Trust, Southmead Hospital, Bristol
8. Leicester Royal Infirmary, University Hospitals of Leicester NHS Trust, Leicester, UK

1  
2  
3 9. Southampton General Hospital, University Hospital Southampton NHS Foundation Trust,  
4 Southampton, UK  
5

6  
7 10. City Campus, Nottingham University Hospitals NHS Trust, Nottingham, UK  
8

9 11. Department of Upper GI surgery, Royal Preston Hospital, Lancashire Teaching Hospitals  
10 NHS Foundation Trust, Preston, UK  
11

12  
13 12. Department of Oesophago-Gastric Surgery, Salford Royal Hospital, Salford Royal NHS  
14 foundation Trust, Salford, UK  
15

16  
17 13. Royal United Hospitals Bath NHS Foundation Trust, Bath, UK  
18

19 14. Department of Surgery, Royal Infirmary of Edinburgh, NHS Lothian, Edinburgh, UK  
20

21 15. University Hospitals Bristol NHS Foundation Trust, Bristol, UK  
22  
23  
24  
25

26 *\*Corresponding author:*  
27

28 Dr Rachel C. Brierley,  
29

30 [R.Brierley@bristol.ac.uk](mailto:R.Brierley@bristol.ac.uk),  
31

32 Clinical Trials and Evaluation Unit Bristol  
33

34 Bristol Royal Infirmary, Level 7  
35

36 Queen's Building, Marlborough Street  
37

38 Bristol  
39

40 BS2 8HW  
41

42 0117 342 2987  
43  
44  
45

46 **Number of figures: 2**  
47

48 **Number of tables: 0**  
49

50 **Word count: 3479**  
51  
52  
53  
54  
55  
56  
57  
58  
59  
60

## Abbreviations

1  
2  
3  
4  
5  
6 AUGIS- Association of Upper Gastro-Intestinal Surgeons  
7 BRTC- Bristol Randomised Trials Collaboration  
8 BTC- Bristol Trials Centre  
9 ConDuCT-II- Collaboration and innovation for Difficult and Complex randomised controlled  
10 Trials In Invasive procedures  
11 CTEU- Clinical Trials and Evaluation Unit  
12 CTU- Clinical Trials Unit  
13 EORTC- European Organisation for Research and Treatment of Cancer  
14 HRQL- health related quality of life  
15 HTA- Health Technology Assessment  
16 ICER- Incremental Cost-Effectiveness Ratio  
17 INMB- Incremental Net Monetary Benefit  
18 LAO- laparoscopically-assisted oesophagectomy  
19 MDT – multidisciplinary team MFI- multidimensional fatigue inventory  
20 MRC- Medical Research Council  
21 NHS- National Health Service  
22 NIHR- National Institute for Health Research  
23 OO- open oesophagectomy  
24 PIL – patient information leaflet  
25 QA- quality assurance  
26 QALY- quality adjusted life years  
27 QLQ- quality of life questionnaire  
28 QRI - QuinteT Recruitment Intervention  
29 RCT- randomised controlled trial  
30 REC- Research Ethics Committee  
31 TMIO- totally minimally invasive oesophagectomy  
32 UK- United Kingdom  
33 UKCRC- UK Clinical Research Collaboration  
34  
35  
36  
37  
38  
39  
40  
41  
42  
43  
44  
45  
46  
47  
48  
49  
50  
51  
52  
53  
54  
55  
56  
57  
58  
59  
60

**Abstract: (up to approx. 250 words)**

Introduction: Surgery (oesophagectomy), with neoadjuvant chemo(radio)therapy, is the main curative treatment for patients with oesophageal cancer. Several surgical approaches can be used to remove an oesophageal tumour. The Ivor Lewis (two phase procedure) is usually used in the UK. This can be performed as an open oesophagectomy (OO), a laparoscopically-assisted oesophagectomy (LAO) or a totally minimally invasive oesophagectomy (TMIO). All three are performed in the NHS, with LAO and OO the most common. However, there is limited evidence about which surgical approach is best for patients in terms of survival and post-operative health-related quality of life.

Methods and analysis: We will undertake a UK multicentre randomised controlled trial to compare LAO with OO in adult patients with oesophageal cancer. The primary outcome is patient-reported physical function at 3 and 6 weeks post-operatively and 3 months post-randomisation. Secondary outcomes include: post-operative complications, survival, disease recurrence, other measures of quality of life, spirometry, success of patient blinding and quality assurance measures. A cost-effectiveness analysis will be performed comparing LAO with OO. We will embed a randomised IDEAL phase 2b sub-study to evaluate the safety and evolution of the TMIO procedure and a qualitative recruitment intervention to optimise patient recruitment. We will analyse the primary outcome using a multi-level regression model. Patients will be monitored for up to 3 years after their surgery.

Ethics and dissemination: This study received approval from South-West Frenchay Research Ethics Committee. We will submit the results for publication in a peer-reviewed journal.

Trial registration number: ISRCTN10386621



## Article summary

### *Strengths and limitations of this study*

- The ROMIO study will compare laparoscopically-assisted oesophagectomy with open oesophagectomy, which are the procedures most relevant to UK practice.
- We will assess the quality of the surgery, using operative images and pathology.
- The primary outcome (recovery of physical function up to 3 months) considers what matters most to patients about having an oesophagectomy.
- Patients will be blinded to their surgical procedure for 6 days post-operatively (use of large dressings) to achieve an unbiased assessment of pain but it will not be possible to blind patients for the primary outcome.
- ROMIO incorporates a randomised sub-study to collect data on totally minimally invasive oesophagectomy, which is an evolving technique.

For peer review only

## Introduction:

In the UK, about 8900 people are diagnosed with oesophageal cancer each year and the incidence is increasing [1]. Surgical removal of the oesophagus (oesophagectomy), with or without chemo(radio)therapy, is currently the most commonly recommended treatment for patients whose cancer is confined to the oesophagus and the local lymph nodes and who are fit to undergo major surgery. The objective of treatment is a surgical cure but only about 40 to 50% of patients survive for 3 years or more following treatment [1]. The surgical procedure depends on the location and size of the tumour and individual surgeon choice. There are a number of different surgical approaches used in the NHS, but the most commonly used procedure involves removing the bottom part of the oesophagus and part of the top of the stomach (the two-phase Ivor Lewis oesophagectomy). The remaining stomach is fashioned into a tube and brought up into the chest to replace the removed oesophagus.

In the past 10 years there has been an increase in the use of minimally invasive surgical techniques and, according to the latest Association of Upper Gastro-Intestinal Surgeons (AUGIS) audit, 42% of oesophagectomies were performed using Laparoscopically-Assisted Oesophagectomy (LAO) or Totally Minimally Invasive Oesophagectomy (TMIO)[2]. However, it is uncertain whether laparoscopic surgery improves patient recovery after surgery or has any impact on survival.

Observational studies suggest that TMIO achieves the same survival benefit as Open Oesophagectomy (OO) but with better recovery and reduced rates of post-operative pneumonia [3-5], although the apparent faster recovery may be due to the selection of fitter patients for the minimally invasive procedure. To date, seven randomised controlled trials (RCTs) comparing OO with LAO (n=2) or TMIO (n=4) or robot-assisted TMIO (n=1) have been conducted[6-12]. All had modest sample sizes (26-221 patients) and five out of the seven studies were conducted in a single centre (China = 3, Austria = 1, Netherlands = 1). The studies measured short term primary outcomes such as pulmonary infection (n=2)[7, 9],

1  
2  
3 post-operative complications (n=4)[6, 10-12] and duration of operation (n=1)[8]. In one RCT,  
4 patients were randomised to a surgeon rather than procedure, meaning the treatment effect  
5 may be influenced by a difference in skill between surgeons choosing LAO and those  
6 choosing OO [11]. All but one of the RCTs[12] were at unclear risk of selection bias, either  
7 due to random sequence generation (n=3) or allocation concealment (n=6). The best  
8 evidence comes from two multicentre RCTs, the MIRO and TIME trials. MIRO randomised  
9 207 participants in twelve French centres. Patients were randomised to OO (n=104) or LAO  
10 (n=103). They compared intra-operative and post-operative complications, classified as  
11 grade 2 or above using Clavien-Dindo, within 30 days. There was a lower incidence of  
12 complications in those allocated to LAO (36%) compared to those allocated to open  
13 oesophagectomy (64%, odds ratio [OR] 0.31, 95% CI 0.18-0.55) However, patients were  
14 randomised using opaque envelopes in theatre after a pre-operative laparoscopic  
15 investigation [10]. The TIME trial, conducted in five European centres, compared TMIO with  
16 OO in 115 patients [7] and reported a 70% reduction in pulmonary infection in the TMIO  
17 group in the first 2 weeks post-operatively (relative risk [RR] 0.30, 95% CI 0.12-0.76).[7]  
18 However, the TMIO procedure is not well-established in the UK.[13]

19  
20  
21  
22  
23  
24  
25  
26  
27  
28  
29  
30  
31  
32  
33  
34  
35  
36  
37  
38  
39  
40  
41 We are conducting a large, multicentre RCT (the ROMIO trial) to compare the clinical and  
42 cost-effectiveness of LAO vs OO. The trial will provide high quality evidence, relevant to UK  
43 practice, of the risks and benefits of LAO, in terms of recovery, health-related quality of life  
44 (HRQL), cost and survival. Incorporated into the study are:

- 45 • An assessment of the quality of the surgery performed using intra-operative photos  
46 of the procedure and pathology reports[14]
- 47 • An integrated qualitative QuinteT Recruitment Intervention (QRI) to optimise  
48 recruitment[15]

- 1
  - 2
  - 3
  - 4
  - 5
  - 6
  - 7
  - 8
  - 9
  - 10
  - 11
  - 12
  - 13
  - 14
  - 15
  - 16
  - 17
  - 18
  - 19
  - 20
  - 21
  - 22
  - 23
  - 24
  - 25
  - 26
  - 27
  - 28
  - 29
  - 30
  - 31
  - 32
  - 33
  - 34
  - 35
  - 36
  - 37
  - 38
  - 39
  - 40
  - 41
  - 42
  - 43
  - 44
  - 45
  - 46
  - 47
  - 48
  - 49
  - 50
  - 51
  - 52
  - 53
  - 54
  - 55
  - 56
  - 57
  - 58
  - 59
  - 60
- A randomised IDEAL 2b sub-study to investigate the safety and technical changes in TMIO[16]

For peer review only

## Methods and analysis:

We have used the SPIRIT reporting guidelines in this protocol paper.[17]

### Study design

ROMIO is a multicentre randomised controlled trial (RCT) comparing open oesophagectomy (OO) with laparoscopically-assisted oesophagectomy (LAO) in patients with oesophageal cancer. ROMIO will also include a randomised sub-study in two centres to assess the efficacy of TMIO and review safety data, compared with OO and LAO. The sub-study will also document how the technical aspects of TMIO evolve over time and whether the technique 'stabilises' over the course of ROMIO.

### *Entry criteria*

To ensure comparability between centres and surgeons, centres will only be included if they are undertaking at least 50 oesophagectomies per year and have a minimum of two surgeons participating in ROMIO. Surgeons will be assessed (by submitting two unedited anonymised videos) before they will be permitted to enrol their patients for ROMIO. This quality assurance (QA) measure has been described previously.[14]

### *Inclusion criteria*

We will screen all patients undergoing oesophagectomy (with or without neoadjuvant chemo(radio)therapy) in at least eight UK hospitals for eligibility (see Figure 1). We will include patients who are at least 18 years old, with at least adenocarcinoma or squamous cell cancer of the oesophagus or oesophago-gastric junction, who have been referred for oesophagectomy by the multidisciplinary team after neoadjuvant chemotherapy or chemoradiotherapy (any type). Patients will be included if their tumour is localised (has not spread beyond the local lymph nodes), is more than 5 cm below the crico-pharyngeus (the muscle that keeps the oesophagus shut) and involves less than 4 cm of the stomach wall.

1  
2  
3 Patients will only be included if they have been assessed as fit for surgery and are able to  
4 provide written informed consent.  
5  
6

### 7 *Exclusion criteria*

8  
9  
10 Patients will be excluded if they have high-grade dysplasia or if the cancer has spread  
11 beyond the oesophagus (T4b) or any stage with M1. All patients must be eligible for either  
12 open or minimally invasive surgery and must not be taking part in any other research that  
13 would interfere with the ROMIO protocol.  
14  
15  
16  
17

### 18 *Randomisation*

19  
20  
21 The local research team will take written informed consent from participants. They will then  
22 randomise participants up to 2 weeks before their operation using a secure internet-based  
23 randomisation system. A computer programme will be used to generate the allocation  
24 sequence used for randomisation. Randomisation will be stratified by neoadjuvant treatment  
25 and site. Randomisation within blocks of varying size will prevent large imbalances in the  
26 number of patients in each treatment group. Participants will be randomised to receive either  
27 OO or LAO in a 1:1 ratio (with a varying block size of 6 or 8). In two centres, patients may  
28 also be randomised to receive TMIO, in a 1:1:1 ratio (with a varying block size of 6 or 9).  
29 The surgical team will be informed of the patient allocation after randomisation and before  
30 surgery (see Figure 1).  
31  
32  
33  
34  
35  
36  
37  
38  
39  
40  
41  
42  
43  
44  
45  
46

### 47 *Trial interventions*

48  
49  
50 The intervention being compared in ROMIO is the surgical approach, i.e. whether the  
51 surgeon uses large (OO) or smaller incisions (LAO or TMIO) to perform the operation (see  
52 Figure 2). Internally, the operation being performed is expected to be the same, regardless  
53 of the surgical approach used. Placement of a feeding jejunostomy or naso-jejunal tube will  
54 also be at the surgeon's discretion, as well as the use of intra-abdominal and intra-thoracic  
55  
56  
57  
58  
59  
60

1  
2  
3 drains. Details of the surgical technique were established during the feasibility study and as  
4 part of the embedded QA study and are intended to be pragmatic.[14, 18] OO will be  
5 performed using large incisions in both the abdomen and the chest (see Figure 2); the  
6 location and length of incisions are at each surgeon's discretion. LAO will be performed  
7 laparoscopically using 5mm and/or 12mm incisions (as many as needed, according to  
8 surgeon preference) in the abdomen. One large incision will be made in the chest (see  
9 Figure 2). If a feeding jejunostomy tube is placed, this may be performed laparoscopically or  
10 by creating an abdominal incision (no bigger than 8cm). In the two centres participating in  
11 the sub-study, around 33% of patients will have a TMIO. In this approach, the surgeon will  
12 make small incisions in the abdomen and in the chest. For the abdominal part of the  
13 procedure, laparoscopic techniques will be used as described above. The surgeon will  
14 access the thoracic cavity using 12mm and/or 5mm incisions (as many as needed) and  
15 perform the surgery thoracoscopically (see Figure 2).

16  
17  
18  
19  
20  
21  
22  
23  
24  
25  
26  
27  
28  
29  
30  
31  
32  
33 Procedures to minimise diaphragmatic herniation (where one or more of the abdominal  
34 organs moves into the chest) can be performed at the surgeon's discretion. The  
35 anastomotic technique and methods to close the incisions are at the surgeon's discretion.  
36 Any deviations from the specified procedures must be fully documented and will be reviewed  
37 by the study management group.

38  
39  
40  
41  
42  
43  
44  
45 All surgical interventions will be carried out under general anaesthesia according to local  
46 hospital protocols. Patients will receive antibiotics and deep vein thrombosis prophylaxis  
47 according to local hospital policies. Co-interventions such as peri-operative analgesia (e.g.  
48 epidural anaesthesia or paravertebral catheters) and monitoring (e.g. central or arterial lines)  
49 will be permitted according to the preferences of each centre.

50  
51  
52  
53  
54  
55  
56  
57  
58 Participants have the right to discontinue their part in the study at any time. In addition, the  
59 investigator may withdraw the participant from their allocated treatment group if, subsequent  
60

1  
2  
3 to randomisation, a clinical reason for not performing the surgical intervention is discovered.  
4  
5 Participants withdrawn from their allocated intervention but willing to continue completing  
6  
7 follow-up schedules will be encouraged to do so. All discontinuations and withdrawals will be  
8  
9 documented.  
10

### 11 12 13 *Primary outcome*

14  
15 The primary outcome is recovery of physical function assessed using the established,  
16  
17 validated patient-reported European Organisation for Research and Treatment of Cancer  
18  
19 quality of life questionnaire (EORTC-QLQ-C30) at three and six weeks post-surgery and  
20  
21 three months after randomisation[19]. This quality of life measure was selected as the key  
22  
23 benefits of minimally invasive surgical techniques are the potential for less tissue damage  
24  
25 and consequently less pain and a more rapid recovery of function.[20] Patient groups also  
26  
27 indicated that quality of life is an outcome that is very important to them.  
28  
29  
30

### 31 32 *Secondary outcome measures*

33  
34 Secondary outcomes will assess the efficacy of the OO and LAO in terms of morbidity,  
35  
36 survival and safety. Secondary outcomes will include:  
37  
38

#### 39 *Survival*

- 40  
41 • Overall and disease-free survival for at least 2-years.

#### 42 43 *Complications*

- 44  
45 • All-cause short and long-term complications for up to 3 years post-randomisation[21].
- 46  
47 • Any complications within 30 days of surgery, as assessed using the Clavien-Dindo  
48  
49 System.[22]
- 50  
51 • Length of hospital stay (defined as length of primary hospital stay plus readmission  
52  
53 within 30 days / length of primary hospital stay plus length of hospital stay if  
54  
55 discharged to community hospital).  
56  
57  
58  
59  
60



- Forced expiratory volume in one second and forced vital capacity measured by spirometry, measured at baseline and days 3 and 6 post-operatively.

#### *Cost-effectiveness*

- Incremental net monetary benefit of LAO over OO 2 years after surgery.

#### *Quality of life*

- We will measure generic and disease specific aspects of HRQL using the following validated questionnaires at baseline, 6 days, 3 weeks and 6 weeks post-surgery and 3, 6, 9, 12, 18, 24 and, where possible, 36 months post-randomisation:
  - EORTC QLQ-C30[19] – a questionnaire developed to assess the health-related quality of life of cancer patients;
  - EORTC QLQ-OES18[23, 24]– a questionnaire developed to assess the health-related quality of life for oesophageal cancer patients;
  - MFI-20 [25, 26]– a tool widely used to assess fatigue in cancer patients;
  - EuroQOL EQ-5D-5L [27, 28] –a widely used generic quality of life questionnaire.

We will also measure pain pre-operatively and post-operatively at days 3 and 6 using the visual analogue scale (VAS)[29].

#### *Quality assurance*

We will assess QA of surgery (reported previously[14]) using:

- Intra-operative photographs will be taken at key stages throughout each procedure and submitted to the study database for on-going monitoring of the operations. Anonymised images will be reviewed and rated by surgical assessors.
- Histopathological measures assessed by pathologists blinded to the treatment allocation, including length of the oesophagus; total counts of nodes – all and malignant (positive) nodes; details of resection margins and pT staging. The slides of 10% of all cases from each centre will be reviewed by the lead pathologist.
- Success of patient blinding during the first six days post-operatively, assessed using the Bang blinding procedure[30]

1  
2  
3 Outcome data will be collected onto case report forms (unless questionnaires are specified)  
4  
5 and entered onto a study-specific database for data cleaning and analysis.

6  
7 Data about adverse events will be collected and reported in accordance with Sponsor and  
8  
9 regulatory requirements.  
10

### 11 12 13 *Patient and Public Involvement*

14  
15  
16 Patient groups were consulted at the design stage, these feedback from these patient  
17  
18 consultations shaped the primary outcome and other aspects of the study. We have patient  
19  
20 representatives as grant co-applicants and as independent members of the trial steering  
21  
22 committee, in addition to this we will regularly consult patient and public groups about  
23  
24 different aspects of the study as it is ongoing. Patients have provided feedback on the  
25  
26 burden involved in participating in the research.  
27  
28  
29  
30

### 31 32 *Methods used to minimise bias*

33  
34 Patients will be blinded to their treatment allocation by covering all potential incision sites for  
35  
36 all surgical approaches (regardless of the actual operation performed) with large dressings  
37  
38 for the first 6 days post-operatively. On day 6 patients will be asked to complete a booklet  
39  
40 containing all of the quality of life questionnaires (QLQ-C30, OES-18, MFI-20, EQ5D5L) and  
41  
42 a pain assessment using the VAS. Success of blinding will be assessed using the Bang  
43  
44 Blinding Index.[30] Due to the nature of the study intervention, it is not possible to blind  
45  
46 patients for the completion of the quality of life questionnaires at the primary outcome  
47  
48 timepoints. However, patients have not had this surgery before so will not have anything to  
49  
50 compare it to, furthermore, participants in the study are unlikely to have a strong preference  
51  
52 for one approach over another.  
53  
54  
55

56  
57 Pathologists assessing QA of surgery will also be blinded to the randomised allocation. As  
58  
59 the intervention is surgery, there may be variation in surgeon skill or surgical technique. This  
60

1  
2  
3 will be managed by stratifying the randomisation by centre. Surgical QA is described in more  
4 detail elsewhere.[14]  
5  
6  
7  
8

9 Loss to follow up will be minimised by maintaining regular contact with patients (by  
10 telephone and post) to complete follow-up questionnaires. No additional visits are required  
11 for the study.  
12  
13  
14  
15

### 16 17 18 19 *Sample size*

20 203 participants in each of the LAO and OO groups will allow a minimum clinically important  
21 difference of 0.4 standard deviations on the primary outcome to be detected with more than  
22 90% power at the 5% significance level, allowing for 15% of participants not following their  
23 allocated procedure, and 10% failing to complete the primary outcome. We anticipate that  
24 approximately 40 additional patients will be randomised to TMIO in the sub-study.  
25  
26  
27  
28  
29  
30  
31  
32  
33  
34

### 35 *Statistical analysis*

36 The results will be reported according to the CONSORT guidelines, including the extension  
37 for patient reported outcomes.[31] We will analyse the data according to the intention to treat  
38 principle, in that the groups compared will be based on allocated treatment irrespective of  
39 the actual operation that the patient had. Participants missing all three assessments  
40 contributing to the primary outcome measure will not be included in the primary analysis, but  
41 we will use sensitivity analyses to investigate the potential impact of any missing data. We  
42 will adjust analyses for treatment centre, whether the participant underwent neoadjuvant  
43 chemo(radio)therapy and the baseline value of the outcome under comparison. We will  
44 prepare and make publicly available a detailed analysis plan prior to locking the database.  
45  
46  
47  
48  
49  
50  
51  
52  
53  
54  
55

56 The primary outcome measure (difference between LAO and OO treatment groups) will be  
57 the reported difference in mean EORTC-QLQ-C30 scores for recovery of physical function  
58  
59  
60

1  
2  
3 (with 95% confidence interval and p-value). The difference in mean scores will be estimated  
4  
5 as the co-efficient of a binary variable distinguishing the two treatment groups, in a multi-  
6  
7 level regression model, with covariates as detailed. This analysis will be conducted  
8  
9 separately for data from the feasibility and main trials, and the two treatment effect estimates  
10  
11 pooled as a weighted average. The same approach will be adapted to the assessment of  
12  
13 pain during the six days post-operatively and other measures of HRQL.  
14  
15

16 In addition, we will compare post-operative length of stay and accommodate the skewed  
17  
18 distribution of this measure by a log-transformed analysis model presenting ratios of  
19  
20 geometric means, 95% confidence interval and p-value.  
21  
22

23 We will present frequencies of the key treatment complications by treatment allocation.  
24  
25 Severity of treatment complications will be compared between allocated treatment groups by  
26  
27 scoring each patient according to their most severe Clavien-Dindo category and estimating  
28  
29 the difference as an odds ratio using ordered logistic regression.  
30  
31

32 We will use proportional hazards regression to estimate the treatment difference in overall  
33  
34 and disease-free survival. A Kaplan-Meier plot will present survival over time in the OO and  
35  
36 LAO groups.  
37  
38

### 39 *Subgroup analyses*

40  
41  
42 A sub-group analysis will investigate whether the relative effects of OO and LAO differ  
43  
44 according to whether a participant underwent neoadjuvant chemotherapy /  
45  
46 chemoradiotherapy beforehand.  
47  
48

### 49 *Analysis of the nested IDEAL 2b study*

50  
51  
52 Data about the TMIO group will be collected and reported separately to the comparison  
53  
54 between the OO and LAO groups. We will document the inclusion / exclusion of patients for  
55  
56 the TMIO procedure and any reasons for not performing the TMIO operation according to  
57  
58 the randomised allocation. We will document the complications of TMIO and perform some  
59  
60

1  
2  
3 analyses of safety and adverse events compared with the OO and LAO groups. We will  
4 document the evolution of the technical aspects of this procedure according to the IDEAL 2b  
5 framework.  
6  
7  
8  
9

### 10 *Cost-effectiveness analysis*

11  
12 We will convert EQ-5D-5L [18, 19] responses to utilities using the NICE-recommended UK  
13 tariff at the time of analysis.[32] These will be combined with survival data to calculate  
14 QALYs, adjusted for differences in baseline EQ-5D utility scores.[33] We will estimate  
15 theatre costs by collecting detailed information on equipment used and staff time (e.g.  
16 surgeons, anaesthetist, scrub nurse). We will collect information on intensive care resource  
17 use and re-interventions during the initial hospital stay. We will also collect and analyse data  
18 on health care resources used in subsequent inpatient stays, outpatient visits, general  
19 practitioner visits and other community health services. We will use nationally available unit  
20 costs to value resource use where available.  
21  
22  
23  
24  
25  
26  
27  
28  
29  
30  
31  
32  
33  
34

35 We will perform the cost-effectiveness analysis on an intention to treat basis from both an  
36 NHS perspective, and a wider personal and social care perspective. We will estimate the  
37 cost-effectiveness of LAO compared with OO by calculating the Incremental Net Monetary  
38 Benefit (INMB) and, if appropriate, the Incremental Cost-Effectiveness Ratio (ICER). We will  
39 present uncertainty in these estimates using a cost-effectiveness acceptability curve and/or  
40 cost-effectiveness ellipses. We will perform cost analyses at 3 and 24 months post-  
41 randomisation. At 24 months, we will discount the cost estimates at the rate recommended  
42 by HM Treasury at the time of analysis.[34] We will conduct one-way sensitivity analyses  
43 including varying the discount rate. Where appropriate, we will use simple or multiple  
44 imputation techniques for missing data.  
45  
46  
47  
48  
49  
50  
51  
52  
53  
54  
55  
56

### 57 **Ethics and dissemination:**

1  
2  
3 All study interventions are already routinely used in the NHS. This study has been reviewed  
4 and given favourable opinion by the South West - Frenchay Research Ethics Committee on  
5 25<sup>th</sup> April 2016 (REC, study ref: 184167). We will disseminate the findings by usual  
6 academic channels, i.e. presentation at international meetings and peer-reviewed  
7 publications. We will write a full report for the funder on the completion of the study and we  
8 will provide a lay summary of the results to patient organisations.  
9  
10  
11  
12  
13  
14  
15  
16  
17

### 18 *Study progress*

19  
20 Recruitment started in October 2016 and we have recruited 277 patients, with an additional  
21 32 TMIO patients (correct on 03 Apr 2019). We have agreed with the funder to continue  
22 recruitment until September 2019, beyond the planned completion of recruitment in  
23 November 2018. We will also include approximately 120 patients recruited to the feasibility  
24 study, having secured permission to continue recruitment to that study whilst the main trial  
25 was being set up.  
26  
27  
28  
29  
30  
31  
32  
33  
34

### 35 *Major changes to the study protocol*

36  
37 Since the first study protocol was approved by the REC (the current version is v7.0, 25  
38 October 2018), we have made the following changes:  
39

- 40  
41 • We updated the expected adverse events section to reflect the results of an  
42 international consensus paper on standardising reporting of complications of  
43 oesophagectomy[21] and to clarify that we will not collect events related to  
44 chemotherapy.  
45  
46  
47  
48
- 49 • We included information about plans to link with external registries (Intensive Care  
50 National Audit Research Centre, Public Health England, Information Services  
51 Division) to obtain more detailed data about ROMIO patient care in hospitals, for the  
52 purpose of economic analysis and to capture information on acute post-operative  
53 complications and recovery.  
54  
55  
56  
57  
58  
59  
60

### **Figure legends**

1  
2  
3 Figure 1 CONSORT diagram outline (MDT: multi-disciplinary team; PIL: patient information  
4 leaflet; MIO: minimally invasive oesophagectomy; LAO: laparoscopically-assisted  
5 oesophagectomy; OO: open oesophagectomy)  
6

7 Figure 2 Diagrams representing the incisions the surgeon may make for the three different  
8 surgical approaches  
9

10  
11  
12  
13  
14  
15  
16  
17  
18  
19  
20  
21  
22  
23  
24  
25  
26  
27  
28  
29  
30  
31  
32  
33  
34  
35  
36  
37  
38  
39  
40  
41  
42  
43  
44  
45  
46  
47  
48  
49  
50  
51  
52  
53  
54  
55  
56  
57  
58  
59  
60

For peer review only

## References

1. CRUK, C.R. *About oesophageal cancer*. 2018; Available from: <https://www.cancerresearchuk.org/about-cancer/oesophageal-cancer/about>.
2. Varagunam M, P.M., Sinha S, Cromwell D, Maynard N, Crosby T, Trudgill N, Michalowski J, Napper R, *National Oesophago-Gastric Cancer Audit, 2018*. London: Royal College of Surgeons of England, 2018.
3. Naftoux, P., et al., *Minimally invasive oesophagectomy: a valuable alternative to open oesophagectomy for the treatment of early oesophageal and gastro-oesophageal junction carcinoma*. Eur J Cardiothorac Surg, 2011. **40**(6): p. 1455-63; discussion 1463-4.
4. Sihag, S., et al., *Comparison of perioperative outcomes following open versus minimally invasive Ivor Lewis oesophagectomy at a single, high-volume centre*. Eur J Cardiothorac Surg, 2012. **42**(3): p. 430-7.
5. Tsujimoto, H., et al., *Video-assisted thoracoscopic surgery for esophageal cancer attenuates postoperative systemic responses and pulmonary complications*. Surgery, 2012. **151**(5): p. 667-73.
6. van der Sluis, P.C.M.D.P.M., et al., *Robot-assisted Minimally Invasive Thoracoscopic Esophagectomy Versus Open Transthoracic Esophagectomy for Resectable Esophageal Cancer: A Randomized Controlled Trial*. Annals of Surgery, 2019. **269**(4): p. 621-630.
7. Biere, S.S., et al., *Minimally invasive versus open oesophagectomy for patients with oesophageal cancer: a multicentre, open-label, randomised controlled trial*. Lancet, 2012. **379**(9829): p. 1887-92.
8. Guo, M., et al., *A comparative study of the therapeutic effect in two protocols: video-assisted thoracic surgery combined with laparoscopy versus right open transthoracic esophagectomy for esophageal cancer management*. Chinese-German J Clin Oncol, 2013. **12**(2): p. 68-71.
9. Hong, L., et al., *The Short-Term Outcome of Three-Field Minimally Invasive Esophagectomy for Siewert Type I Esophagogastric Junctional Adenocarcinoma*. Ann Thorac Surg, 2013. **96**: p. 1826-32.
10. Mariette, C., et al., *Hybrid Minimally Invasive Esophagectomy for Esophageal Cancer*. N Engl J Med, 2019. **380**(2): p. 152-162.
11. Ma, G., et al., *Comparison of the short-term clinical outcome between open and minimally invasive esophagectomy by comprehensive complication index*. J Cancer Res Ther, 2018. **14**(4): p. 789-794.
12. Paireder, M., et al., *Morbidity in open versus minimally invasive hybrid esophagectomy (MIOMIE): Long-term results of a randomized controlled clinical study*. Eur Surg, 2018. **50**(6): p. 249-255.
13. Varagunam, M., et al., *National OesophagoGastric Cancer Audit*. 2017.
14. Blencowe, N.S., et al., *Protocol for developing quality assurance measures to use in surgical trials: an example from the ROMIO study*. BMJ Open, 2019. **9**(3): p. e026209.
15. Donovan, J.L., et al., *Optimising recruitment and informed consent in randomised controlled trials: the development and implementation of the Quintet Recruitment Intervention (QRI)*. Trials, 2016. **17**(1): p. 283.
16. Hirst, A., et al., *No Surgical Innovation Without Evaluation: Evolution and Further Development of the IDEAL Framework and Recommendations*. Annals of Surgery, 2019. **269**(2): p. 211-220.
17. Chan, A.W., et al., *SPIRIT 2013 statement: defining standard protocol items for clinical trials*. Ann Intern Med, 2013. **158**(3): p. 200-7.
18. Avery, K.N., et al., *The feasibility of a randomized controlled trial of esophagectomy for esophageal cancer--the ROMIO (Randomized Oesophagectomy: Minimally Invasive or Open) study: protocol for a randomized controlled trial*. Trials, 2014. **15**: p. 200.



19. Aaronson, N.K., et al., *The European Organization for Research and Treatment of Cancer QLQ-C30: a quality-of-life instrument for use in international clinical trials in oncology*. J Natl Cancer Inst, 1993. **85**(5): p. 365-76.
20. Veldkamp, R., et al., *Laparoscopic surgery versus open surgery for colon cancer: short-term outcomes of a randomised trial*. Lancet Oncol, 2005. **6**(7): p. 477-84.
21. Low, D.E., et al., *International Consensus on Standardization of Data Collection for Complications Associated With Esophagectomy: Esophagectomy Complications Consensus Group (ECCG)*. Ann Surg, 2015. **262**(2): p. 286-94.
22. Dindo, D., N. Demartines, and P.A. Clavien, *Classification of surgical complications: a new proposal with evaluation in a cohort of 6336 patients and results of a survey*. Ann Surg, 2004. **240**(2): p. 205-13.
23. Blazeby, J.M., et al., *Clinical and psychometric validation of an EORTC questionnaire module, the EORTC QLQ-OES18, to assess quality of life in patients with oesophageal cancer*. Eur J Cancer, 2003. **39**(10): p. 1384-94.
24. Smithers, B.M., et al., *Comparison of the outcomes between open and minimally invasive esophagectomy*. Ann Surg, 2007. **245**(2): p. 232-40.
25. Parameswaran, R., et al., *Health-related quality of life after minimally invasive oesophagectomy*. Br J Surg, 2010. **97**(4): p. 525-31.
26. Smets, E.M., et al., *The Multidimensional Fatigue Inventory (MFI) psychometric qualities of an instrument to assess fatigue*. J Psychosom Res, 1995. **39**(3): p. 315-25.
27. Clinical Outcomes of Surgical Therapy Study Group, *A comparison of laparoscopically assisted and open colectomy for colon cancer*. N Engl J Med, 2004. **350**(20): p. 2050-9.
28. Herdman, M., et al., *Development and preliminary testing of the new five-level version of EQ-5D (EQ-5D-5L)*. Qual Life Res, 2011. **20**(10): p. 1727-36.
29. Hauser, K. and D. Walsh, *Visual analogue scales and assessment of quality of life in cancer*. J Support Oncol, 2008. **6**(6): p. 277-82.
30. Bang, H., L. Ni, and C.E. Davis, *Assessment of blinding in clinical trials*. Control Clin Trials, 2004. **25**(2): p. 143-56.
31. Calvert, M., et al., *Reporting of patient-reported outcomes in randomized trials: the CONSORT PRO extension*. JAMA, 2013. **309**(8): p. 814-22.
32. NICE. *Guide to the methods of technology appraisal*. 2013 [03 April 2019]; Available from: nice.org.uk/process/pmg9.
33. Manca, A., Hawkins, N, Sculpher, M, *Estimating mean QALYs in trial-based cost-effectiveness analysis: the importance of controlling for baseline utility*. Health Economics, 2005. **14**(5): p. 487-496.
34. Treasury, H., *The Green Book – Central Government Guidance on Appraisal and Evaluation*. 2018.

### Author contributions:

All authors critically revised manuscript for important intellectual content and approved the manuscript.

- Rachel C Brierley developed the study design and aims, drafted the protocol and initiated the study, drafted the manuscript and oversaw study conduct and acquisition of data.

- 1  
2  
3 • Daisy M Gaunt developed the study design and aims, drafted the protocol and  
4 initiated the study. DMG also oversaw statistical aspects and analyses for the study.  
5  
6  
7
- 8  
9 • Chris Metcalfe developed the study concept and obtained grant funding, developed  
10 the study design and aims, drafted the protocol and initiated the study. CM also  
11 oversaw statistical aspects and analyses for the study.  
12  
13  
14
- 15  
16 • Jane M Blazeby developed the study concept and obtained grant funding, developed  
17 the study design and aims, drafted the protocol and initiated the study, oversaw the  
18 embedded quality assurance study and clinical aspects of the study.  
19  
20  
21
- 22  
23 • Natalie S Blencowe developed the study concept and obtained grant funding,  
24 developed the study design and aims, drafted the protocol and initiated the study,  
25 oversaw the embedded quality assurance study.  
26  
27  
28
- 29  
30 • Marcus Jepson developed the study design and aims, drafted the protocol and  
31 initiated the study, oversaw the embedded qualitative study.  
32  
33  
34
- 35  
36 • Richard Berrisford developed the study concept and obtained grant funding,  
37 developed the study design and aims, drafted the protocol and initiated the study.  
38 Principal investigator and acquired data for the study.  
39  
40  
41
- 42  
43 • Kerry N L Avery developed the study concept and obtained grant funding, developed  
44 the study design and aims, drafted the protocol and initiated the study, oversaw  
45 patient and public involvement.  
46  
47  
48
- 49  
50 • Lucy Culliford developed the study design and aims, drafted the protocol and initiated  
51 the study.  
52  
53  
54
- 55  
56 • William Hollingworth developed and oversaw health economic aspects of the study.  
57  
58  
59  
60

- 1
- 2
- 3 • Caoimhe T Rice developed the health economics aspects of the study.
- 4
- 5
- 6
- 7 • Newton Wong developed the study concept and obtained grant funding, developed
- 8 the study design and aims, drafted the protocol and initiated the study and oversaw
- 9 pathology quality assurance in the study.
- 10
- 11
- 12
- 13
- 14 • Aida Moure-Fernandez developed the study design and aims, drafted the protocol
- 15 and initiated the study and developed the health economics aspects of the study.
- 16
- 17
- 18
- 19 • Joanna Nicklin developed the study design and aims, drafted the protocol and
- 20 initiated the study and acquired data for the study.
- 21
- 22
- 23
- 24
- 25 • Anni Skilton developed the study design and aims, drafted the protocol and initiated
- 26 the study and oversaw the embedded quality assurance study.
- 27
- 28
- 29
- 30 • James Byrne was a Principal investigator and acquired data for the study.
- 31
- 32
- 33
- 34 • Tim Underwood was a Principal investigator and acquired data for the study.
- 35
- 36
- 37
- 38 • Peter Lamb was a Principal investigator and acquired data for the study.
- 39
- 40
- 41 • Alex Boddy was a Principal investigator and acquired data for the study.
- 42
- 43
- 44 • Kish Pursnani was a Principal investigator and acquired data for the study.
- 45
- 46
- 47 • Rachel Melhado was a Principal investigator and acquired data for the study.
- 48
- 49
- 50
- 51 • Bilal Alkhaffaf was a Principal investigator and acquired data for the study.
- 52
- 53
- 54 • Ravi Vohra was a Principal investigator and acquired data for the study.
- 55
- 56
- 57 • James Catton was a Principal investigator and acquired data for the study.
- 58
- 59
- 60

- 1
- 2
- 3 • Richard Krysztopik was a Principal investigator and acquired data for the study.
- 4
- 5
- 6
- 7 • Chris Rogers developed the study concept and obtained grant funding, developed
- 8 the study design and aims, drafted the protocol and initiated the study.
- 9
- 10
- 11
- 12 • Benjamin Howes developed the study concept and obtained grant funding,
- 13 developed the study design and aims, drafted the protocol and initiated the study.
- 14
- 15
- 16
- 17 • Katy Chalmers conducted the systematic review.
- 18
- 19
- 20
- 21 • Sian Cousins conducted the systematic review.
- 22
- 23
- 24 • Jackie Elliott developed the study concept and obtained grant funding and
- 25 contributed to PPI aspects of the study.
- 26
- 27
- 28
- 29
- 30 • Jenny Donovan developed the study concept and obtained grant funding, developed
- 31 the study design and aims, drafted the protocol and initiated the study and oversaw
- 32 the embedded qualitative study.
- 33
- 34
- 35
- 36
- 37 • Rachael Heyes conducted the study.
- 38
- 39
- 40
- 41 • Robin Wickens conducted the study.
- 42
- 43
- 44 • Paul Wilkerson acquired data for the study.
- 45
- 46
- 47
- 48 • Andy Hollowood acquired data for the study.
- 49
- 50
- 51 • Christopher Streets acquired data for the study.
- 52
- 53
- 54 • Dan Titcomb acquired data for the study.
- 55
- 56
- 57 • Lee Humphreys acquired data for the study.
- 58
- 59
- 60

- 1
- 2
- 3 • Tim Wheatley acquired data for the study.
- 4
- 5
- 6
- 7 • Grant Sanders acquired data for the study.
- 8
- 9
- 10 • Arun Ariyaratnam acquired data for the study.
- 11
- 12
- 13 • Jamie Kelly acquired data for the study.
- 14
- 15
- 16
- 17 • Fergus Noble acquired data for the study.
- 18
- 19
- 20 • Graeme Couper acquired data for the study.
- 21
- 22
- 23 • Richard J. E. Skipworth acquired data for the study.
- 24
- 25
- 26
- 27 • Chris Deans acquired data for the study.
- 28
- 29
- 30 • Sukhbir Ubhi acquired data for the study.
- 31
- 32
- 33 • Rob Williams acquired data for the study.
- 34
- 35
- 36
- 37 • David Bowrey acquired data for the study.
- 38
- 39
- 40 • David Exon acquired data for the study.
- 41
- 42
- 43 • Paul Turner acquired data for the study.
- 44
- 45
- 46
- 47 • Vinutha Shetty acquired data for the study.
- 48
- 49
- 50 • Ram Chaparala acquired data for the study.
- 51
- 52
- 53 • Khurshid Akhtar acquired data for the study.
- 54
- 55
- 56
- 57 • Naheed Farooq acquired data for the study.
- 58
- 59
- 60

- 1
- 2
- 3 • Simon L. Parsons acquired data for the study.
- 4
- 5
- 6
- 7 • Neil Welch acquired data for the study.
- 8
- 9
- 10 • Rebecca Houlihan developed the study design and aims, drafted the protocol and
- 11 initiated the study and acquired data for the study.
- 12
- 13
- 14
- 15 • Joanne Smith acquired data for the study.
- 16
- 17
- 18
- 19 • Rachel Schranz acquired data for the study.
- 20
- 21
- 22 • Nicola Rea acquired data for the study.
- 23
- 24
- 25
- 26 • Jill Cooke acquired data for the study.
- 27
- 28
- 29 • Alexandra Williams acquired data for the study.
- 30
- 31
- 32 • Carolyn Hindmarsh acquired data for the study.
- 33
- 34
- 35
- 36 • Sally Maitland acquired data for the study.
- 37
- 38
- 39 • Lucy Howie acquired data for the study.
- 40
- 41
- 42 • C Paul Barham developed the study concept and obtained grant funding, developed
- 43 the study design and aims, drafted the protocol and initiated the study, oversaw
- 44 clinical aspects of the study, oversaw the embedded quality assurance study and
- 45 was Chief Investigator for the study.
- 46
- 47
- 48
- 49
- 50

### 51 **Acknowledgements:**

52  
53 We would like to thank the large teams at each hospital who work on the ROMIO  
54 study. The hospitals involved with ROMIO are: University Hospitals Bristol NHS  
55 Foundation Trust, Bristol, England; University Hospitals Plymouth NHS Trust,  
56 Plymouth, England; University Hospital Southampton NHS Foundation Trust,  
57 Southampton, England; NHS Lothian, Edinburgh, Scotland; University Hospitals of  
58 Leicester NHS Trust, Leicester, England; Lancashire Teaching Hospitals NHS  
59 Foundation Trust, Preston, England; Salford Royal NHS Foundation Trust,  
60

1  
2  
3 Manchester, England; Nottingham University Hospitals NHS Trust, Nottingham,  
4 England; Royal United Hospitals Bath NHS Foundation Trust, Bath, England. We  
5 would also like to thank Maria Pufulete, Madeleine Clout and Kate Harris for  
6 commenting on the draft manuscript.  
7

8  
9 This study was sponsored by University Hospitals Bristol NHS Foundation Trust,  
10 Research and Innovation, Level 3, UH Bristol Education and Research Centre,  
11 Upper Maudlin Street, Bristol BS2 8AE.  
12

13 The study is overseen by an independent steering committee and an independent  
14 data monitoring committee.  
15

16  
17 Steering Committee membership: Craig Ramsay (Chair, Professor in Health  
18 Services Research, University of Aberdeen, Scotland); Tony Ingold (Trustee,  
19 Oesophageal Patients Association, England); Heike Grabsch (Professor of  
20 Gastrointestinal Pathology, Maastricht University, Netherlands); William Allum  
21 (Consultant Upper Gastrointestinal Surgeon, Royal Marsden NHS Foundation Trust,  
22 London, England); Richard Hardwick (Consultant Upper Gastrointestinal Surgeon &  
23 Lead Clinician for Upper GI Cancer, Cambridge University Hospitals NHS FT,  
24 Cambridge, England); Colin Green (Professor of Health Economics, University of  
25 Exeter, Exeter, England); Helen Marshall (Principal Statistician, University of Leeds,  
26 Leeds, England).  
27  
28

29  
30 Data Monitoring Committee membership: Judith Bliss (Chair, Professor of Clinical  
31 Trials, Institute of Cancer Research, London, England); William Robb (Consultant  
32 Upper Gastrointestinal Surgeon, Beaumont Hospital & Royal College of Surgeons in  
33 Ireland, Dublin, Ireland); Derek Alderson (President of the Royal College of  
34 Surgeons and emeritus Professor of Surgery, University of Birmingham,  
35 Birmingham, England).  
36

### 37 **Funding statement:**

38  
39 This research was funded by the National Institute for Health Research (NIHR)  
40 Health Technology Assessment (HTA) programme (project number 14/140/78).  
41  
42

43 We also received funding support from the Bristol Biomedical Research Centre, the  
44 Medical Research Council (MRC) ConDuCT-II (Collaboration and innovation for  
45 Difficult and Complex randomised controlled Trials In Invasive procedures) Hub for  
46 Trials Methodology Research (MR/K025643/1) and the NIHR Biomedical Research  
47 Centre at University Hospitals Bristol NHS Foundation Trust and the University of  
48 Bristol.  
49

50  
51 This study was designed and delivered in collaboration with the Clinical Trials and  
52 Evaluation Unit (CTEU) and the Bristol Randomised Trials Collaboration (BRTC),  
53 both are UKCRC registered clinical trials units, which are known collectively as the  
54 Bristol Trials Centre (BTC), and receive National Institute for Health Research  
55 Clinical Trials Unit (CTU) support funding.  
56  
57

58 Department of Health Disclaimer:  
59  
60

1  
2  
3 The views and opinions expressed therein are those of the authors and do not  
4 necessarily reflect those of the HTA programme, NIHR, NHS or the Department of  
5 Health.  
6

7  
8 The funder and Sponsors approve any amendments to the study but have no direct  
9 involvement in study design; collection, management, analysis, and interpretation of  
10 data; writing of the report; and the decision to submit this report for publication.  
11

## 12 **Competing interests statement**

13  
14 No competing interests are declared  
15

## 16 **Data Sharing**

17  
18 Data will not be made available for sharing until after publication of the main results of the  
19 research. Thereafter, anonymised individual patient data will be made available for  
20 secondary research, conditional on assurance from the secondary researcher that the  
21 proposed use of the data is compliant with the MRC Policy on Data Preservation and  
22 Sharing regarding scientific quality, ethical requirements and value for money. A minimum  
23 requirement with respect to scientific quality will be a publicly available pre-specified protocol  
24 describing the purpose, methods and analysis of the secondary research, e.g. a protocol for  
25 a Cochrane systematic review. The second file containing patient identifiers would be made  
26 available for record linkage or a similar purpose, subject to confirmation that the secondary  
27 research protocol has been approved by a UK REC or other similar, approved ethics review  
28 body.  
29  
30  
31  
32  
33  
34  
35  
36  
37  
38  
39  
40  
41  
42  
43  
44  
45  
46  
47  
48  
49  
50  
51  
52  
53  
54  
55  
56  
57  
58  
59  
60



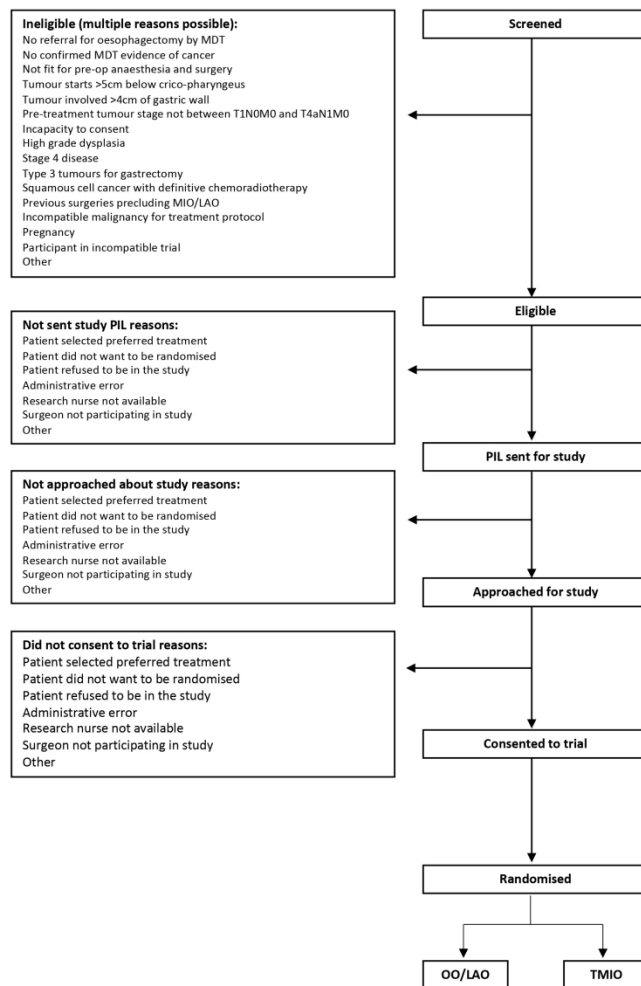

Figure 1 CONSORT diagram outline (MDT: multi-disciplinary team; PIL: patient information leaflet; MIO: minimally invasive oesophagectomy; LAO: laparoscopically-assisted oesophagectomy; OO: open oesophagectomy)

Figure 1 CONSORT diagram outline (MDT: multi-disciplinary team; PIL: patient information leaflet; MIO: minimally invasive oesophagectomy; LAO: laparoscopically-assisted oesophagectomy; OO: open oesophagectomy)

190x275mm (300 x 300 DPI)

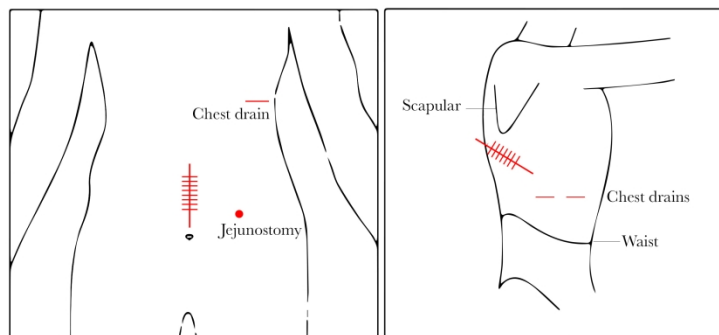

A. Open oesophagectomy (OO)

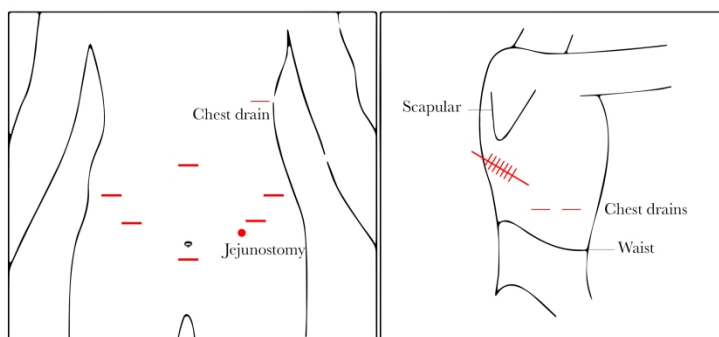

B. Laparoscopically assisted oesophagectomy (LAO)

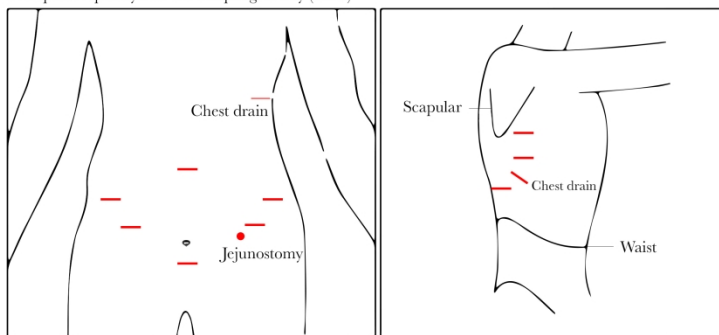

C. Totally minimally invasive oesophagectomy (TMIO)

Figure 2 Diagrams representing the incisions the surgeon may make for the three different surgical approaches

Figure 2 Diagrams representing the incisions the surgeon may make for the three different surgical approaches

293x358mm (300 x 300 DPI)

# Reporting checklist for protocol of a clinical trial.

Based on the SPIRIT guidelines.

## Instructions to authors

Complete this checklist by entering the page numbers from your manuscript where readers will find each of the items listed below.

Your article may not currently address all the items on the checklist. Please modify your text to include the missing information. If you are certain that an item does not apply, please write "n/a" and provide a short explanation.

Upload your completed checklist as an extra file when you submit to a journal.

In your methods section, say that you used the SPIRIT reporting guidelines, and cite them as:

Chan A-W, Tetzlaff JM, Altman DG, Laupacis A, Gøtzsche PC, Krleža-Jerić K, Hróbjartsson A, Mann H, Dickersin K, Berlin J, Doré C, Parulekar W, Summerskill W, Groves T, Schulz K, Sox H, Rockhold FW, Rennie D, Moher D. SPIRIT 2013 Statement: Defining standard protocol items for clinical trials. *Ann Intern Med.* 2013;158(3):200-207

|                                             |                     | Reporting Item                                                                                               | Page Number                                                |
|---------------------------------------------|---------------------|--------------------------------------------------------------------------------------------------------------|------------------------------------------------------------|
| Title                                       | <a href="#">#1</a>  | Descriptive title identifying the study design, population, interventions, and, if applicable, trial acronym | 1                                                          |
| Trial registration                          | <a href="#">#2a</a> | Trial identifier and registry name. If not yet registered, name of intended registry                         | 4                                                          |
| Trial registration: data set                | <a href="#">#2b</a> | All items from the World Health Organization Trial Registration Data Set                                     | All relevant information is included throughout the paper. |
| Protocol version                            | <a href="#">#3</a>  | Date and version identifier                                                                                  | 17                                                         |
| Funding                                     | <a href="#">#4</a>  | Sources and types of financial, material, and other support                                                  | 21-22                                                      |
| Roles and responsibilities: contributorship | <a href="#">#5a</a> | Names, affiliations, and roles of protocol contributors                                                      | 1-2, 20-21                                                 |

|    |                      |                     |                                                    |     |
|----|----------------------|---------------------|----------------------------------------------------|-----|
| 1  | Roles and            | <a href="#">#5b</a> | Name and contact information for the trial         | 21  |
| 2  | responsibilities:    |                     | sponsor                                            |     |
| 3  | sponsor contact      |                     |                                                    |     |
| 4  | information          |                     |                                                    |     |
| 5  |                      |                     |                                                    |     |
| 6  |                      |                     |                                                    |     |
| 7  | Roles and            | <a href="#">#5c</a> | Role of study sponsor and funders, if any, in      | 22  |
| 8  | responsibilities:    |                     | study design; collection, management,              |     |
| 9  | sponsor and          |                     | analysis, and interpretation of data; writing of   |     |
| 10 | funder               |                     | the report; and the decision to submit the         |     |
| 11 |                      |                     | report for publication, including whether they     |     |
| 12 |                      |                     | will have ultimate authority over any of these     |     |
| 13 |                      |                     | activities                                         |     |
| 14 |                      |                     |                                                    |     |
| 15 |                      |                     |                                                    |     |
| 16 |                      |                     |                                                    |     |
| 17 |                      |                     |                                                    |     |
| 18 |                      |                     |                                                    |     |
| 19 | Roles and            | <a href="#">#5d</a> | Composition, roles, and responsibilities of the    | 21  |
| 20 | responsibilities:    |                     | coordinating centre, steering committee,           |     |
| 21 | committees           |                     | endpoint adjudication committee, data              |     |
| 22 |                      |                     | management team, and other individuals or          |     |
| 23 |                      |                     | groups overseeing the trial, if applicable (see    |     |
| 24 |                      |                     | Item 21a for data monitoring committee)            |     |
| 25 |                      |                     |                                                    |     |
| 26 |                      |                     |                                                    |     |
| 27 |                      |                     |                                                    |     |
| 28 |                      |                     |                                                    |     |
| 29 | Background and       | <a href="#">#6a</a> | Description of research question and               | 6-7 |
| 30 | rationale            |                     | justification for undertaking the trial, including |     |
| 31 |                      |                     | summary of relevant studies (published and         |     |
| 32 |                      |                     | unpublished) examining benefits and harms          |     |
| 33 |                      |                     | for each intervention                              |     |
| 34 |                      |                     |                                                    |     |
| 35 |                      |                     |                                                    |     |
| 36 |                      |                     |                                                    |     |
| 37 | Background and       | <a href="#">#6b</a> | Explanation for choice of comparators              | 6-7 |
| 38 | rationale: choice of |                     |                                                    |     |
| 39 | comparators          |                     |                                                    |     |
| 40 |                      |                     |                                                    |     |
| 41 |                      |                     |                                                    |     |
| 42 | Objectives           | <a href="#">#7</a>  | Specific objectives or hypotheses                  | 7   |
| 43 |                      |                     |                                                    |     |
| 44 |                      |                     |                                                    |     |
| 45 | Trial design         | <a href="#">#8</a>  | Description of trial design including type of      | 9   |
| 46 |                      |                     | trial (eg, parallel group, crossover, factorial,   |     |
| 47 |                      |                     | single group), allocation ratio, and framework     |     |
| 48 |                      |                     | (eg, superiority, equivalence, non-inferiority,    |     |
| 49 |                      |                     | exploratory)                                       |     |
| 50 |                      |                     |                                                    |     |
| 51 |                      |                     |                                                    |     |
| 52 |                      |                     |                                                    |     |
| 53 | Study setting        | <a href="#">#9</a>  | Description of study settings (eg, community       | 21  |
| 54 |                      |                     | clinic, academic hospital) and list of countries   |     |
| 55 |                      |                     | where data will be collected. Reference to         |     |
| 56 |                      |                     | where list of study sites can be obtained          |     |
| 57 |                      |                     |                                                    |     |
| 58 |                      |                     |                                                    |     |
| 59 |                      |                     |                                                    |     |
| 60 |                      |                     |                                                    |     |

|    |                                 |                      |                                                                                                                                                                                                                                                                                                                                                                                |                                                  |
|----|---------------------------------|----------------------|--------------------------------------------------------------------------------------------------------------------------------------------------------------------------------------------------------------------------------------------------------------------------------------------------------------------------------------------------------------------------------|--------------------------------------------------|
| 1  | Eligibility criteria            | <a href="#">#10</a>  | Inclusion and exclusion criteria for participants. If applicable, eligibility criteria for study centres and individuals who will perform the interventions (eg, surgeons, psychotherapists)                                                                                                                                                                                   | 9-10                                             |
| 2  |                                 |                      |                                                                                                                                                                                                                                                                                                                                                                                |                                                  |
| 3  |                                 |                      |                                                                                                                                                                                                                                                                                                                                                                                |                                                  |
| 4  |                                 |                      |                                                                                                                                                                                                                                                                                                                                                                                |                                                  |
| 5  |                                 |                      |                                                                                                                                                                                                                                                                                                                                                                                |                                                  |
| 6  |                                 |                      |                                                                                                                                                                                                                                                                                                                                                                                |                                                  |
| 7  |                                 |                      |                                                                                                                                                                                                                                                                                                                                                                                |                                                  |
| 8  |                                 |                      |                                                                                                                                                                                                                                                                                                                                                                                |                                                  |
| 9  | Interventions: description      | <a href="#">#11a</a> | Interventions for each group with sufficient detail to allow replication, including how and when they will be administered                                                                                                                                                                                                                                                     | 10-11                                            |
| 10 |                                 |                      |                                                                                                                                                                                                                                                                                                                                                                                |                                                  |
| 11 |                                 |                      |                                                                                                                                                                                                                                                                                                                                                                                |                                                  |
| 12 |                                 |                      |                                                                                                                                                                                                                                                                                                                                                                                |                                                  |
| 13 |                                 |                      |                                                                                                                                                                                                                                                                                                                                                                                |                                                  |
| 14 | Interventions: modifications    | <a href="#">#11b</a> | Criteria for discontinuing or modifying allocated interventions for a given trial participant (eg, drug dose change in response to harms, participant request, or improving / worsening disease)                                                                                                                                                                               | 11                                               |
| 15 |                                 |                      |                                                                                                                                                                                                                                                                                                                                                                                |                                                  |
| 16 |                                 |                      |                                                                                                                                                                                                                                                                                                                                                                                |                                                  |
| 17 |                                 |                      |                                                                                                                                                                                                                                                                                                                                                                                |                                                  |
| 18 |                                 |                      |                                                                                                                                                                                                                                                                                                                                                                                |                                                  |
| 19 |                                 |                      |                                                                                                                                                                                                                                                                                                                                                                                |                                                  |
| 20 |                                 |                      |                                                                                                                                                                                                                                                                                                                                                                                |                                                  |
| 21 |                                 |                      |                                                                                                                                                                                                                                                                                                                                                                                |                                                  |
| 22 |                                 |                      |                                                                                                                                                                                                                                                                                                                                                                                |                                                  |
| 23 | Interventions: adherence        | <a href="#">#11c</a> | Strategies to improve adherence to intervention protocols, and any procedures for monitoring adherence (eg, drug tablet return; laboratory tests)                                                                                                                                                                                                                              | n/a- ROMIO is a pragmatic trial                  |
| 24 |                                 |                      |                                                                                                                                                                                                                                                                                                                                                                                |                                                  |
| 25 |                                 |                      |                                                                                                                                                                                                                                                                                                                                                                                |                                                  |
| 26 |                                 |                      |                                                                                                                                                                                                                                                                                                                                                                                |                                                  |
| 27 |                                 |                      |                                                                                                                                                                                                                                                                                                                                                                                |                                                  |
| 28 |                                 |                      |                                                                                                                                                                                                                                                                                                                                                                                |                                                  |
| 29 |                                 |                      |                                                                                                                                                                                                                                                                                                                                                                                |                                                  |
| 30 | Interventions: concomitant care | <a href="#">#11d</a> | Relevant concomitant care and interventions that are permitted or prohibited during the trial                                                                                                                                                                                                                                                                                  | 10 (otherwise n/a as ROMIO is a pragmatic trial) |
| 31 |                                 |                      |                                                                                                                                                                                                                                                                                                                                                                                |                                                  |
| 32 |                                 |                      |                                                                                                                                                                                                                                                                                                                                                                                |                                                  |
| 33 |                                 |                      |                                                                                                                                                                                                                                                                                                                                                                                |                                                  |
| 34 |                                 |                      |                                                                                                                                                                                                                                                                                                                                                                                |                                                  |
| 35 | Outcomes                        | <a href="#">#12</a>  | Primary, secondary, and other outcomes, including the specific measurement variable (eg, systolic blood pressure), analysis metric (eg, change from baseline, final value, time to event), method of aggregation (eg, median, proportion), and time point for each outcome. Explanation of the clinical relevance of chosen efficacy and harm outcomes is strongly recommended | 12-13                                            |
| 36 |                                 |                      |                                                                                                                                                                                                                                                                                                                                                                                |                                                  |
| 37 |                                 |                      |                                                                                                                                                                                                                                                                                                                                                                                |                                                  |
| 38 |                                 |                      |                                                                                                                                                                                                                                                                                                                                                                                |                                                  |
| 39 |                                 |                      |                                                                                                                                                                                                                                                                                                                                                                                |                                                  |
| 40 |                                 |                      |                                                                                                                                                                                                                                                                                                                                                                                |                                                  |
| 41 |                                 |                      |                                                                                                                                                                                                                                                                                                                                                                                |                                                  |
| 42 |                                 |                      |                                                                                                                                                                                                                                                                                                                                                                                |                                                  |
| 43 |                                 |                      |                                                                                                                                                                                                                                                                                                                                                                                |                                                  |
| 44 |                                 |                      |                                                                                                                                                                                                                                                                                                                                                                                |                                                  |
| 45 |                                 |                      |                                                                                                                                                                                                                                                                                                                                                                                |                                                  |
| 46 |                                 |                      |                                                                                                                                                                                                                                                                                                                                                                                |                                                  |
| 47 |                                 |                      |                                                                                                                                                                                                                                                                                                                                                                                |                                                  |
| 48 |                                 |                      |                                                                                                                                                                                                                                                                                                                                                                                |                                                  |
| 49 | Participant timeline            | <a href="#">#13</a>  | Time schedule of enrolment, interventions (including any run-ins and washouts), assessments, and visits for participants. A schematic diagram is highly recommended (see Figure)                                                                                                                                                                                               | 10, 12-13                                        |
| 50 |                                 |                      |                                                                                                                                                                                                                                                                                                                                                                                |                                                  |
| 51 |                                 |                      |                                                                                                                                                                                                                                                                                                                                                                                |                                                  |
| 52 |                                 |                      |                                                                                                                                                                                                                                                                                                                                                                                |                                                  |
| 53 |                                 |                      |                                                                                                                                                                                                                                                                                                                                                                                |                                                  |
| 54 |                                 |                      |                                                                                                                                                                                                                                                                                                                                                                                |                                                  |
| 55 |                                 |                      |                                                                                                                                                                                                                                                                                                                                                                                |                                                  |
| 56 |                                 |                      |                                                                                                                                                                                                                                                                                                                                                                                |                                                  |
| 57 |                                 |                      |                                                                                                                                                                                                                                                                                                                                                                                |                                                  |
| 58 |                                 |                      |                                                                                                                                                                                                                                                                                                                                                                                |                                                  |
| 59 |                                 |                      |                                                                                                                                                                                                                                                                                                                                                                                |                                                  |
| 60 |                                 |                      |                                                                                                                                                                                                                                                                                                                                                                                |                                                  |

|    |                                                |                      |                                                                                                                                                                                                                                                                                                                                                          |                                                                                                                          |
|----|------------------------------------------------|----------------------|----------------------------------------------------------------------------------------------------------------------------------------------------------------------------------------------------------------------------------------------------------------------------------------------------------------------------------------------------------|--------------------------------------------------------------------------------------------------------------------------|
| 1  | Sample size                                    | <a href="#">#14</a>  | Estimated number of participants needed to achieve study objectives and how it was determined, including clinical and statistical assumptions supporting any sample size calculations                                                                                                                                                                    | 14                                                                                                                       |
| 2  |                                                |                      |                                                                                                                                                                                                                                                                                                                                                          |                                                                                                                          |
| 3  |                                                |                      |                                                                                                                                                                                                                                                                                                                                                          |                                                                                                                          |
| 4  |                                                |                      |                                                                                                                                                                                                                                                                                                                                                          |                                                                                                                          |
| 5  |                                                |                      |                                                                                                                                                                                                                                                                                                                                                          |                                                                                                                          |
| 6  |                                                |                      |                                                                                                                                                                                                                                                                                                                                                          |                                                                                                                          |
| 7  |                                                |                      |                                                                                                                                                                                                                                                                                                                                                          |                                                                                                                          |
| 8  |                                                |                      |                                                                                                                                                                                                                                                                                                                                                          |                                                                                                                          |
| 9  | Recruitment                                    | <a href="#">#15</a>  | Strategies for achieving adequate participant enrolment to reach target sample size                                                                                                                                                                                                                                                                      | Not included here                                                                                                        |
| 10 |                                                |                      |                                                                                                                                                                                                                                                                                                                                                          |                                                                                                                          |
| 11 |                                                |                      |                                                                                                                                                                                                                                                                                                                                                          |                                                                                                                          |
| 12 |                                                |                      |                                                                                                                                                                                                                                                                                                                                                          |                                                                                                                          |
| 13 | Allocation:<br>sequence<br>generation          | <a href="#">#16a</a> | Method of generating the allocation sequence (eg, computer-generated random numbers), and list of any factors for stratification. To reduce predictability of a random sequence, details of any planned restriction (eg, blocking) should be provided in a separate document that is unavailable to those who enrol participants or assign interventions | 10                                                                                                                       |
| 14 |                                                |                      |                                                                                                                                                                                                                                                                                                                                                          |                                                                                                                          |
| 15 |                                                |                      |                                                                                                                                                                                                                                                                                                                                                          |                                                                                                                          |
| 16 |                                                |                      |                                                                                                                                                                                                                                                                                                                                                          |                                                                                                                          |
| 17 |                                                |                      |                                                                                                                                                                                                                                                                                                                                                          |                                                                                                                          |
| 18 |                                                |                      |                                                                                                                                                                                                                                                                                                                                                          |                                                                                                                          |
| 19 |                                                |                      |                                                                                                                                                                                                                                                                                                                                                          |                                                                                                                          |
| 20 |                                                |                      |                                                                                                                                                                                                                                                                                                                                                          |                                                                                                                          |
| 21 |                                                |                      |                                                                                                                                                                                                                                                                                                                                                          |                                                                                                                          |
| 22 |                                                |                      |                                                                                                                                                                                                                                                                                                                                                          |                                                                                                                          |
| 23 |                                                |                      |                                                                                                                                                                                                                                                                                                                                                          |                                                                                                                          |
| 24 |                                                |                      |                                                                                                                                                                                                                                                                                                                                                          |                                                                                                                          |
| 25 |                                                |                      |                                                                                                                                                                                                                                                                                                                                                          |                                                                                                                          |
| 26 | Allocation<br>concealment<br>mechanism         | <a href="#">#16b</a> | Mechanism of implementing the allocation sequence (eg, central telephone; sequentially numbered, opaque, sealed envelopes), describing any steps to conceal the sequence until interventions are assigned                                                                                                                                                | 10                                                                                                                       |
| 27 |                                                |                      |                                                                                                                                                                                                                                                                                                                                                          |                                                                                                                          |
| 28 |                                                |                      |                                                                                                                                                                                                                                                                                                                                                          |                                                                                                                          |
| 29 |                                                |                      |                                                                                                                                                                                                                                                                                                                                                          |                                                                                                                          |
| 30 |                                                |                      |                                                                                                                                                                                                                                                                                                                                                          |                                                                                                                          |
| 31 |                                                |                      |                                                                                                                                                                                                                                                                                                                                                          |                                                                                                                          |
| 32 |                                                |                      |                                                                                                                                                                                                                                                                                                                                                          |                                                                                                                          |
| 33 |                                                |                      |                                                                                                                                                                                                                                                                                                                                                          |                                                                                                                          |
| 34 | Allocation:<br>implementation                  | <a href="#">#16c</a> | Who will generate the allocation sequence, who will enrol participants, and who will assign participants to interventions                                                                                                                                                                                                                                | 10                                                                                                                       |
| 35 |                                                |                      |                                                                                                                                                                                                                                                                                                                                                          |                                                                                                                          |
| 36 |                                                |                      |                                                                                                                                                                                                                                                                                                                                                          |                                                                                                                          |
| 37 |                                                |                      |                                                                                                                                                                                                                                                                                                                                                          |                                                                                                                          |
| 38 |                                                |                      |                                                                                                                                                                                                                                                                                                                                                          |                                                                                                                          |
| 39 | Blinding (masking)                             | <a href="#">#17a</a> | Who will be blinded after assignment to interventions (eg, trial participants, care providers, outcome assessors, data analysts), and how                                                                                                                                                                                                                | 13                                                                                                                       |
| 40 |                                                |                      |                                                                                                                                                                                                                                                                                                                                                          |                                                                                                                          |
| 41 |                                                |                      |                                                                                                                                                                                                                                                                                                                                                          |                                                                                                                          |
| 42 |                                                |                      |                                                                                                                                                                                                                                                                                                                                                          |                                                                                                                          |
| 43 |                                                |                      |                                                                                                                                                                                                                                                                                                                                                          |                                                                                                                          |
| 44 |                                                |                      |                                                                                                                                                                                                                                                                                                                                                          |                                                                                                                          |
| 45 |                                                |                      |                                                                                                                                                                                                                                                                                                                                                          |                                                                                                                          |
| 46 | Blinding (masking):<br>emergency<br>unblinding | <a href="#">#17b</a> | If blinded, circumstances under which unblinding is permissible, and procedure for revealing a participant's allocated intervention during the trial                                                                                                                                                                                                     | N/A –pathologists are blinded. Patients are blinded until a week after surgery, success of patient blinding is assessed. |
| 47 |                                                |                      |                                                                                                                                                                                                                                                                                                                                                          |                                                                                                                          |
| 48 |                                                |                      |                                                                                                                                                                                                                                                                                                                                                          |                                                                                                                          |
| 49 |                                                |                      |                                                                                                                                                                                                                                                                                                                                                          |                                                                                                                          |
| 50 |                                                |                      |                                                                                                                                                                                                                                                                                                                                                          |                                                                                                                          |
| 51 |                                                |                      |                                                                                                                                                                                                                                                                                                                                                          |                                                                                                                          |
| 52 |                                                |                      |                                                                                                                                                                                                                                                                                                                                                          |                                                                                                                          |
| 53 |                                                |                      |                                                                                                                                                                                                                                                                                                                                                          |                                                                                                                          |
| 54 |                                                |                      |                                                                                                                                                                                                                                                                                                                                                          |                                                                                                                          |
| 55 |                                                |                      |                                                                                                                                                                                                                                                                                                                                                          |                                                                                                                          |
| 56 | Data collection<br>plan                        | <a href="#">#18a</a> | Plans for assessment and collection of outcome, baseline, and other trial data,                                                                                                                                                                                                                                                                          | 12-13                                                                                                                    |
| 57 |                                                |                      |                                                                                                                                                                                                                                                                                                                                                          |                                                                                                                          |
| 58 |                                                |                      |                                                                                                                                                                                                                                                                                                                                                          |                                                                                                                          |
| 59 |                                                |                      |                                                                                                                                                                                                                                                                                                                                                          |                                                                                                                          |
| 60 |                                                |                      |                                                                                                                                                                                                                                                                                                                                                          |                                                                                                                          |

including any related processes to promote data quality (eg, duplicate measurements, training of assessors) and a description of study instruments (eg, questionnaires, laboratory tests) along with their reliability and validity, if known. Reference to where data collection forms can be found, if not in the protocol

|    |                      |                      |                                                   |
|----|----------------------|----------------------|---------------------------------------------------|
| 1  |                      |                      |                                                   |
| 2  |                      |                      |                                                   |
| 3  |                      |                      |                                                   |
| 4  |                      |                      |                                                   |
| 5  |                      |                      |                                                   |
| 6  |                      |                      |                                                   |
| 7  |                      |                      |                                                   |
| 8  |                      |                      |                                                   |
| 9  |                      |                      |                                                   |
| 10 |                      |                      |                                                   |
| 11 |                      |                      |                                                   |
| 12 |                      |                      |                                                   |
| 13 | Data collection      | <a href="#">#18b</a> | Plans to promote participant retention and        |
| 14 | plan: retention      |                      | complete follow-up, including list of any         |
| 15 |                      |                      | outcome data to be collected for participants     |
| 16 |                      |                      | who discontinue or deviate from intervention      |
| 17 |                      |                      | protocols                                         |
| 18 |                      |                      |                                                   |
| 19 |                      |                      |                                                   |
| 20 |                      |                      |                                                   |
| 21 | Data management      | <a href="#">#19</a>  | Plans for data entry, coding, security, and       |
| 22 |                      |                      | storage, including any related processes to       |
| 23 |                      |                      | promote data quality (eg, double data entry;      |
| 24 |                      |                      | range checks for data values). Reference to       |
| 25 |                      |                      | where details of data management                  |
| 26 |                      |                      | procedures can be found, if not in the protocol   |
| 27 |                      |                      |                                                   |
| 28 |                      |                      |                                                   |
| 29 |                      |                      |                                                   |
| 30 |                      |                      |                                                   |
| 31 | Statistics:          | <a href="#">#20a</a> | Statistical methods for analysing primary and     |
| 32 | outcomes             |                      | secondary outcomes. Reference to where            |
| 33 |                      |                      | other details of the statistical analysis plan    |
| 34 |                      |                      | can be found, if not in the protocol              |
| 35 |                      |                      |                                                   |
| 36 |                      |                      |                                                   |
| 37 |                      |                      |                                                   |
| 38 | Statistics:          | <a href="#">#20b</a> | Methods for any additional analyses (eg,          |
| 39 | additional analyses  |                      | subgroup and adjusted analyses)                   |
| 40 |                      |                      |                                                   |
| 41 |                      |                      |                                                   |
| 42 | Statistics: analysis | <a href="#">#20c</a> | Definition of analysis population relating to     |
| 43 | population and       |                      | protocol non-adherence (eg, as randomised         |
| 44 | missing data         |                      | analysis), and any statistical methods to         |
| 45 |                      |                      | handle missing data (eg, multiple imputation)     |
| 46 |                      |                      |                                                   |
| 47 |                      |                      |                                                   |
| 48 | Data monitoring:     | <a href="#">#21a</a> | Composition of data monitoring committee          |
| 49 | formal committee     |                      | (DMC); summary of its role and reporting          |
| 50 |                      |                      | structure; statement of whether it is             |
| 51 |                      |                      | independent from the sponsor and competing        |
| 52 |                      |                      | interests; and reference to where further         |
| 53 |                      |                      | details about its charter can be found, if not in |
| 54 |                      |                      |                                                   |
| 55 |                      |                      |                                                   |
| 56 |                      |                      |                                                   |
| 57 |                      |                      |                                                   |
| 58 |                      |                      |                                                   |
| 59 |                      |                      |                                                   |
| 60 |                      |                      |                                                   |

|    |                                      |                                                                                                                                                                                                                                                        |                                   |
|----|--------------------------------------|--------------------------------------------------------------------------------------------------------------------------------------------------------------------------------------------------------------------------------------------------------|-----------------------------------|
|    |                                      | the protocol. Alternatively, an explanation of why a DMC is not needed                                                                                                                                                                                 |                                   |
| 1  |                                      |                                                                                                                                                                                                                                                        |                                   |
| 2  |                                      |                                                                                                                                                                                                                                                        |                                   |
| 3  |                                      |                                                                                                                                                                                                                                                        |                                   |
| 4  | Data monitoring:<br>interim analysis | <a href="#">#21b</a> Description of any interim analyses and stopping guidelines, including who will have access to these interim results and make the final decision to terminate the trial                                                           | n/a – no interim analyses planned |
| 5  |                                      |                                                                                                                                                                                                                                                        |                                   |
| 6  |                                      |                                                                                                                                                                                                                                                        |                                   |
| 7  |                                      |                                                                                                                                                                                                                                                        |                                   |
| 8  |                                      |                                                                                                                                                                                                                                                        |                                   |
| 9  |                                      |                                                                                                                                                                                                                                                        |                                   |
| 10 | Harms                                | <a href="#">#22</a> Plans for collecting, assessing, reporting, and managing solicited and spontaneously reported adverse events and other unintended effects of trial interventions or trial conduct                                                  | 14                                |
| 11 |                                      |                                                                                                                                                                                                                                                        |                                   |
| 12 |                                      |                                                                                                                                                                                                                                                        |                                   |
| 13 |                                      |                                                                                                                                                                                                                                                        |                                   |
| 14 |                                      |                                                                                                                                                                                                                                                        |                                   |
| 15 |                                      |                                                                                                                                                                                                                                                        |                                   |
| 16 |                                      |                                                                                                                                                                                                                                                        |                                   |
| 17 |                                      |                                                                                                                                                                                                                                                        |                                   |
| 18 |                                      |                                                                                                                                                                                                                                                        |                                   |
| 19 | Auditing                             | <a href="#">#23</a> Frequency and procedures for auditing trial conduct, if any, and whether the process will be independent from investigators and the sponsor                                                                                        | 11                                |
| 20 |                                      |                                                                                                                                                                                                                                                        |                                   |
| 21 |                                      |                                                                                                                                                                                                                                                        |                                   |
| 22 |                                      |                                                                                                                                                                                                                                                        |                                   |
| 23 |                                      |                                                                                                                                                                                                                                                        |                                   |
| 24 |                                      |                                                                                                                                                                                                                                                        |                                   |
| 25 |                                      |                                                                                                                                                                                                                                                        |                                   |
| 26 | Research ethics approval             | <a href="#">#24</a> Plans for seeking research ethics committee / institutional review board (REC / IRB) approval                                                                                                                                      | 17                                |
| 27 |                                      |                                                                                                                                                                                                                                                        |                                   |
| 28 |                                      |                                                                                                                                                                                                                                                        |                                   |
| 29 |                                      |                                                                                                                                                                                                                                                        |                                   |
| 30 |                                      |                                                                                                                                                                                                                                                        |                                   |
| 31 | Protocol amendments                  | <a href="#">#25</a> Plans for communicating important protocol modifications (eg, changes to eligibility criteria, outcomes, analyses) to relevant parties (eg, investigators, REC / IRBs, trial participants, trial registries, journals, regulators) | 17-18                             |
| 32 |                                      |                                                                                                                                                                                                                                                        |                                   |
| 33 |                                      |                                                                                                                                                                                                                                                        |                                   |
| 34 |                                      |                                                                                                                                                                                                                                                        |                                   |
| 35 |                                      |                                                                                                                                                                                                                                                        |                                   |
| 36 |                                      |                                                                                                                                                                                                                                                        |                                   |
| 37 |                                      |                                                                                                                                                                                                                                                        |                                   |
| 38 |                                      |                                                                                                                                                                                                                                                        |                                   |
| 39 |                                      |                                                                                                                                                                                                                                                        |                                   |
| 40 |                                      |                                                                                                                                                                                                                                                        |                                   |
| 41 | Consent or assent                    | <a href="#">#26a</a> Who will obtain informed consent or assent from potential trial participants or authorised surrogates, and how (see Item 32)                                                                                                      | 10                                |
| 42 |                                      |                                                                                                                                                                                                                                                        |                                   |
| 43 |                                      |                                                                                                                                                                                                                                                        |                                   |
| 44 |                                      |                                                                                                                                                                                                                                                        |                                   |
| 45 |                                      |                                                                                                                                                                                                                                                        |                                   |
| 46 | Consent or assent: ancillary studies | <a href="#">#26b</a> Additional consent provisions for collection and use of participant data and biological specimens in ancillary studies, if applicable                                                                                             | n/a                               |
| 47 |                                      |                                                                                                                                                                                                                                                        |                                   |
| 48 |                                      |                                                                                                                                                                                                                                                        |                                   |
| 49 |                                      |                                                                                                                                                                                                                                                        |                                   |
| 50 |                                      |                                                                                                                                                                                                                                                        |                                   |
| 51 | Confidentiality                      | <a href="#">#27</a> How personal information about potential and enrolled participants will be collected, shared, and maintained in order to protect confidentiality before, during, and after the trial                                               | 21                                |
| 52 |                                      |                                                                                                                                                                                                                                                        |                                   |
| 53 |                                      |                                                                                                                                                                                                                                                        |                                   |
| 54 |                                      |                                                                                                                                                                                                                                                        |                                   |
| 55 |                                      |                                                                                                                                                                                                                                                        |                                   |
| 56 |                                      |                                                                                                                                                                                                                                                        |                                   |
| 57 |                                      |                                                                                                                                                                                                                                                        |                                   |
| 58 |                                      |                                                                                                                                                                                                                                                        |                                   |
| 59 |                                      |                                                                                                                                                                                                                                                        |                                   |
| 60 |                                      |                                                                                                                                                                                                                                                        |                                   |



|    |                       |                      |                                                   |                         |
|----|-----------------------|----------------------|---------------------------------------------------|-------------------------|
| 1  | Declaration of        | <a href="#">#28</a>  | Financial and other competing interests for       | 22                      |
| 2  | interests             |                      | principal investigators for the overall trial and |                         |
| 3  |                       |                      | each study site                                   |                         |
| 4  |                       |                      |                                                   |                         |
| 5  |                       |                      |                                                   |                         |
| 6  | Data access           | <a href="#">#29</a>  | Statement of who will have access to the final    | 22                      |
| 7  |                       |                      | trial dataset, and disclosure of contractual      |                         |
| 8  |                       |                      | agreements that limit such access for             |                         |
| 9  |                       |                      | investigators                                     |                         |
| 10 |                       |                      |                                                   |                         |
| 11 |                       |                      |                                                   |                         |
| 12 |                       |                      |                                                   |                         |
| 13 | Ancillary and post    | <a href="#">#30</a>  | Provisions, if any, for ancillary and post-trial  | N/A                     |
| 14 | trial care            |                      | care, and for compensation to those who           |                         |
| 15 |                       |                      | suffer harm from trial participation              |                         |
| 16 |                       |                      |                                                   |                         |
| 17 |                       |                      |                                                   |                         |
| 18 | Dissemination         | <a href="#">#31a</a> | Plans for investigators and sponsor to            | 17                      |
| 19 | policy: trial results |                      | communicate trial results to participants,        |                         |
| 20 |                       |                      | healthcare professionals, the public, and         |                         |
| 21 |                       |                      | other relevant groups (eg, via publication,       |                         |
| 22 |                       |                      | reporting in results databases, or other data     |                         |
| 23 |                       |                      | sharing arrangements), including any              |                         |
| 24 |                       |                      | publication restrictions                          |                         |
| 25 |                       |                      |                                                   |                         |
| 26 |                       |                      |                                                   |                         |
| 27 |                       |                      |                                                   |                         |
| 28 |                       |                      |                                                   |                         |
| 29 |                       |                      |                                                   |                         |
| 30 | Dissemination         | <a href="#">#31b</a> | Authorship eligibility guidelines and any         | n/a                     |
| 31 | policy: authorship    |                      | intended use of professional writers              |                         |
| 32 |                       |                      |                                                   |                         |
| 33 |                       |                      |                                                   |                         |
| 34 | Dissemination         | <a href="#">#31c</a> | Plans, if any, for granting public access to the  | The protocol is         |
| 35 | policy:               |                      | full protocol, participant-level dataset, and     | publically available on |
| 36 | reproducible          |                      | statistical code                                  | the NIHR website        |
| 37 | research              |                      |                                                   |                         |
| 38 |                       |                      |                                                   |                         |
| 39 |                       |                      |                                                   |                         |
| 40 | Informed consent      | <a href="#">#32</a>  | Model consent form and other related              | Available on request    |
| 41 | materials             |                      | documentation given to participants and           |                         |
| 42 |                       |                      | authorised surrogates                             |                         |
| 43 |                       |                      |                                                   |                         |
| 44 |                       |                      |                                                   |                         |
| 45 |                       |                      |                                                   |                         |
| 46 | Biological            | <a href="#">#33</a>  | Plans for collection, laboratory evaluation,      | N/A                     |
| 47 | specimens             |                      | and storage of biological specimens for           |                         |
| 48 |                       |                      | genetic or molecular analysis in the current      |                         |
| 49 |                       |                      | trial and for future use in ancillary studies, if |                         |
| 50 |                       |                      | applicable                                        |                         |
| 51 |                       |                      |                                                   |                         |
| 52 |                       |                      |                                                   |                         |
| 53 |                       |                      |                                                   |                         |

The SPIRIT checklist is distributed under the terms of the Creative Commons Attribution License CC-BY-ND 3.0. This checklist can be completed online using <https://www.goodreports.org/>, a tool made by the [EQUATOR Network](#) in collaboration with [Penelope.ai](#)

# BMJ Open

## Laparoscopically assisted vs open oesophagectomy for patients with oesophageal cancer – the ROMIO (Randomised Oesophagectomy: Minimally Invasive or Open) study: protocol for a randomized controlled trial (RCT)

|                               |                                                                                                                                                                                                                                                                                                                                                                                                                                                                                                                                                                                                                                                                                                                                                                                                                                                                                                                                                                                                                                                                                                                                                                                                                                                                                                                                                                                                                                                                                                                                                                                                                                                                                                                                                                                                                                                                                                                                                                                                                                                             |
|-------------------------------|-------------------------------------------------------------------------------------------------------------------------------------------------------------------------------------------------------------------------------------------------------------------------------------------------------------------------------------------------------------------------------------------------------------------------------------------------------------------------------------------------------------------------------------------------------------------------------------------------------------------------------------------------------------------------------------------------------------------------------------------------------------------------------------------------------------------------------------------------------------------------------------------------------------------------------------------------------------------------------------------------------------------------------------------------------------------------------------------------------------------------------------------------------------------------------------------------------------------------------------------------------------------------------------------------------------------------------------------------------------------------------------------------------------------------------------------------------------------------------------------------------------------------------------------------------------------------------------------------------------------------------------------------------------------------------------------------------------------------------------------------------------------------------------------------------------------------------------------------------------------------------------------------------------------------------------------------------------------------------------------------------------------------------------------------------------|
| Journal:                      | <i>BMJ Open</i>                                                                                                                                                                                                                                                                                                                                                                                                                                                                                                                                                                                                                                                                                                                                                                                                                                                                                                                                                                                                                                                                                                                                                                                                                                                                                                                                                                                                                                                                                                                                                                                                                                                                                                                                                                                                                                                                                                                                                                                                                                             |
| Manuscript ID                 | bmjopen-2019-030907.R1                                                                                                                                                                                                                                                                                                                                                                                                                                                                                                                                                                                                                                                                                                                                                                                                                                                                                                                                                                                                                                                                                                                                                                                                                                                                                                                                                                                                                                                                                                                                                                                                                                                                                                                                                                                                                                                                                                                                                                                                                                      |
| Article Type:                 | Protocol                                                                                                                                                                                                                                                                                                                                                                                                                                                                                                                                                                                                                                                                                                                                                                                                                                                                                                                                                                                                                                                                                                                                                                                                                                                                                                                                                                                                                                                                                                                                                                                                                                                                                                                                                                                                                                                                                                                                                                                                                                                    |
| Date Submitted by the Author: | 17-Jun-2019                                                                                                                                                                                                                                                                                                                                                                                                                                                                                                                                                                                                                                                                                                                                                                                                                                                                                                                                                                                                                                                                                                                                                                                                                                                                                                                                                                                                                                                                                                                                                                                                                                                                                                                                                                                                                                                                                                                                                                                                                                                 |
| Complete List of Authors:     | <p>Brierley, Rachel; University of Bristol<br/> Gaunt, Daisy; University of Bristol Faculty of Medicine and Dentistry, Bristol Randomised Trials Collaboration &amp; School of Social and Community Medicine; University of Bristol<br/> Metcalfe, Chris; University of Bristol, Social Medicine<br/> Blazeby, Jane; University of Bristol, Department of Social Medicine<br/> Blencowe, Natalie; University of Bristol, Centre for Surgical Research, School of Social and Community Medicine<br/> Jepson, Marcus; University of Bristol School of Social and Community Medicine,<br/> Berrisford, Richard G.; Derriford Hospital, Upper GI Surgery<br/> Avery, Kerry; University of Bristol, School of Social and Community Medicine<br/> Hollingworth, William; University of Bristol, School of Social and Community Medicine<br/> Rice, Caoimhe; University of Bristol, School of Social and Community Medicine<br/> Moire-Fernandez, Aide; University of Bristol<br/> Wong, Newton; Department of Cellular Pathology, North Bristol NHS Trust, Southmead Hospital,<br/> Nicklin, Joanna; University hospitals Bristol NHS Foundation Trust,<br/> Skilton, Anni; University of Bristol<br/> Boddy, Alex; Leicester Royal Infirmary<br/> Byrne, James; University Hospital Southampton, Division of Surgery, University Hospital Southampton NHS Foundation Trust, Tremona Road, Southampton, Hampshire, SO16 6YD<br/> Underwood, Tim; University Hospital Southampton, Division of Surgery, University Hospital Southampton NHS Foundation Trust, Tremona Road, Southampton, Hampshire, SO16 6YD<br/> Vohra, Ravi; Nottingham City Hospital<br/> Catton, James; Nottingham City Hospital<br/> Pursnani, Kish; Royal Preston Hospital<br/> Melhado, Rachel; Salford Royal NHS Foundation Trust<br/> Alkhaffaf, Bilal; Manchester University NHS Foundation Trust, Department of Oesophago-Gastric Surgery<br/> Krysztopik, Richard; Royal United Hospital Bath NHS Trust<br/> Lamb, Peter; Royal Infirmary of Edinburgh, General Surgery Department</p> |

|                                                                                                                                                                                                                                                                                           |                                                                                                                                                                                                                                                                                                                                                                                                                                                                                                                                                                                                                                                                                                                                                                                                                                                                                                                                                                                                                                                                                                                                                                                                                                                                                                                                                                                                                                                                                                                                                                                                                                                                                                                                                                                                                                                                                                                                                                                                                                                                                                                                                                                                                                                                                                                                                                                                                                                                                                                                                                                                                                                                                                                                                                                                                                                                                                                                                                                                                                                                                                                                                                                                                                                                                                                           |
|-------------------------------------------------------------------------------------------------------------------------------------------------------------------------------------------------------------------------------------------------------------------------------------------|---------------------------------------------------------------------------------------------------------------------------------------------------------------------------------------------------------------------------------------------------------------------------------------------------------------------------------------------------------------------------------------------------------------------------------------------------------------------------------------------------------------------------------------------------------------------------------------------------------------------------------------------------------------------------------------------------------------------------------------------------------------------------------------------------------------------------------------------------------------------------------------------------------------------------------------------------------------------------------------------------------------------------------------------------------------------------------------------------------------------------------------------------------------------------------------------------------------------------------------------------------------------------------------------------------------------------------------------------------------------------------------------------------------------------------------------------------------------------------------------------------------------------------------------------------------------------------------------------------------------------------------------------------------------------------------------------------------------------------------------------------------------------------------------------------------------------------------------------------------------------------------------------------------------------------------------------------------------------------------------------------------------------------------------------------------------------------------------------------------------------------------------------------------------------------------------------------------------------------------------------------------------------------------------------------------------------------------------------------------------------------------------------------------------------------------------------------------------------------------------------------------------------------------------------------------------------------------------------------------------------------------------------------------------------------------------------------------------------------------------------------------------------------------------------------------------------------------------------------------------------------------------------------------------------------------------------------------------------------------------------------------------------------------------------------------------------------------------------------------------------------------------------------------------------------------------------------------------------------------------------------------------------------------------------------------------------|
| 1<br>2<br>3<br>4<br>5<br>6<br>7<br>8<br>9<br>10<br>11<br>12<br>13<br>14<br>15<br>16<br>17<br>18<br>19<br>20<br>21<br>22<br>23<br>24<br>25<br>26<br>27<br>28<br>29<br>30<br>31<br>32<br>33<br>34<br>35<br>36<br>37<br>38<br>39<br>40<br>41<br>42<br>43<br>44<br>45<br>46<br>47<br>48<br>49 | <p>Culliford, Lucy; University of Bristol, Bristol Heart Institute, Rogers, Chris; university of bristol, Clinical Science South Bristol<br/>         Howes, Ben; University of Bristol, Anesthetics<br/>         Chalmers, Katy; University of Bristol<br/>         Cousins, Sian; University of Bristol, Population Health Sciences<br/>         Elliott, Jackie<br/>         Donovan, Jenny; University of Bristol<br/>         Heys, Rachael; University of Bristol<br/>         Wickens, Robin; University of Bristol<br/>         wilkerson, paul; University Hospitals Bristol NHS Foundation Trust<br/>         Hollowood, Andrew; University Hospitals Bristol NHS Foundation Trust<br/>         streets, christopher; University Hospitals Bristol NHS Foundation Trust<br/>         titcomb, dan; University Hospitals Bristol NHS Foundation Trust<br/>         humphreys, lee; Derriford Hospital, Upper GI Surgery<br/>         wheatley, tim; Derriford Hospital, Upper GI Surgery<br/>         sanders, Grant; Derriford Hospital, Upper GI Surgery<br/>         ariyathenam, arun; Derriford Hospital, Upper GI Surgery<br/>         kelly, jamie; University Hospital Southampton, Division of Surgery, University Hospital Southampton NHS Foundation Trust, Tremona Road, Southampton, Hampshire, SO16 6YD<br/>         noble, fergus; University Hospital Southampton, Division of Surgery, University Hospital Southampton NHS Foundation Trust, Tremona Road, Southampton, Hampshire, SO16 6YD<br/>         couper, graeme; Royal Infirmary of Edinburgh, General Surgery Department<br/>         skipworth, richard; Royal Infirmary of Edinburgh, General Surgery Department<br/>         deans, chris; Royal Infirmary of Edinburgh, General Surgery Department<br/>         ubhi, sukhbir; Leicester Royal Infirmary<br/>         Williams, R; Leicester Royal Infirmary<br/>         bowrey, david; Leicester Royal Infirmary<br/>         exon, david; Leicester Royal Infirmary<br/>         turner, paul; Royal Preston Hospital<br/>         daya shetty, vinutha; Royal Preston Hospital<br/>         chaparala, ram; Salford Royal NHS Foundation Trust<br/>         akhtar, khurshid; Salford Royal NHS Foundation Trust<br/>         farooq, naheed; Salford Royal NHS Foundation Trust<br/>         Parsons, Simon; Nottingham University Hospitals NHS Trust, Department of General Surgery<br/>         welch, neil; Nottingham City Hospital<br/>         Houlihan, Rebecca; University Hospitals Bristol NHS Foundation Trust<br/>         Smith, Jo; Derriford Hospital, Upper GI Surgery<br/>         Schranz, Rachel; University Hospital Southampton, Division of Surgery, University Hospital Southampton NHS Foundation Trust, Tremona Road, Southampton, Hampshire, SO16 6YD<br/>         rea, nicola; Royal Infirmary of Edinburgh, General Surgery Department<br/>         cooke, jill; Leicester Royal Infirmary<br/>         williams, alexandra; Royal Preston Hospital<br/>         hindmarsh, Carolyn; Salford Royal NHS Foundation Trust<br/>         maitland, sally; Nottingham City Hospital<br/>         howie, lucy; Royal United Hospital Bath NHS Trust<br/>         Barham, C; University Hospitals Bristol NHS Foundation Trust, Division of Surgery</p> |
| 50<br>51                                                                                                                                                                                                                                                                                  | <p>&lt;b&gt;Primary Subject Heading&lt;/b&gt;: Surgery</p>                                                                                                                                                                                                                                                                                                                                                                                                                                                                                                                                                                                                                                                                                                                                                                                                                                                                                                                                                                                                                                                                                                                                                                                                                                                                                                                                                                                                                                                                                                                                                                                                                                                                                                                                                                                                                                                                                                                                                                                                                                                                                                                                                                                                                                                                                                                                                                                                                                                                                                                                                                                                                                                                                                                                                                                                                                                                                                                                                                                                                                                                                                                                                                                                                                                                |
| 52<br>53                                                                                                                                                                                                                                                                                  | <p>Secondary Subject Heading: Health services research</p>                                                                                                                                                                                                                                                                                                                                                                                                                                                                                                                                                                                                                                                                                                                                                                                                                                                                                                                                                                                                                                                                                                                                                                                                                                                                                                                                                                                                                                                                                                                                                                                                                                                                                                                                                                                                                                                                                                                                                                                                                                                                                                                                                                                                                                                                                                                                                                                                                                                                                                                                                                                                                                                                                                                                                                                                                                                                                                                                                                                                                                                                                                                                                                                                                                                                |
| 54<br>55<br>56<br>57<br>58<br>59<br>60                                                                                                                                                                                                                                                    | <p>Keywords: oesophageal cancer, oesophagectomy, quality of life, randomised controlled trial, minimally invasive oesophagectomy</p>                                                                                                                                                                                                                                                                                                                                                                                                                                                                                                                                                                                                                                                                                                                                                                                                                                                                                                                                                                                                                                                                                                                                                                                                                                                                                                                                                                                                                                                                                                                                                                                                                                                                                                                                                                                                                                                                                                                                                                                                                                                                                                                                                                                                                                                                                                                                                                                                                                                                                                                                                                                                                                                                                                                                                                                                                                                                                                                                                                                                                                                                                                                                                                                      |

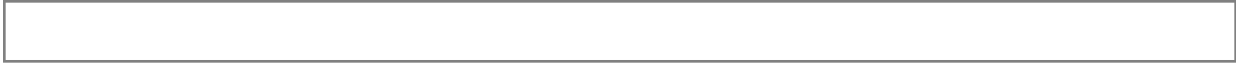

SCHOLARONE™  
Manuscripts

1  
2  
3  
4  
5  
6  
7  
8  
9  
10  
11  
12  
13  
14  
15  
16  
17  
18  
19  
20  
21  
22  
23  
24  
25  
26  
27  
28  
29  
30  
31  
32  
33  
34  
35  
36  
37  
38  
39  
40  
41  
42  
43  
44  
45  
46  
47  
48  
49  
50  
51  
52  
53  
54  
55  
56  
57  
58  
59  
60

# Laparoscopically assisted vs open oesophagectomy for patients with oesophageal cancer – the ROMIO (Randomised Oesophagectomy: Minimally Invasive or Open) study: protocol for a randomized controlled trial (RCT)

Rachel C Brierley<sup>1</sup>, Daisy M Gaunt<sup>2</sup>, Chris Metcalfe<sup>2</sup>, Jane M Blazeby<sup>3,4</sup>, Natalie S Blencowe<sup>3,4</sup>, Marcus Jepson<sup>3</sup>, Richard Berrisford<sup>5</sup>, Kerry N L Avery<sup>3</sup>, William Hollingworth<sup>6</sup>, Caoimhe T Rice<sup>2,6</sup>, Aida Moure-Fernandez<sup>6</sup>, Newton Wong<sup>7</sup>, Joanna Nicklin<sup>4</sup>, Anni Skilton<sup>3</sup>, Alex Boddy<sup>8</sup>, James Byrne<sup>9</sup>, Tim Underwood<sup>9</sup>, Ravi Vohra<sup>10</sup>, James A. Catton<sup>10</sup>, Kish Pursnani<sup>11</sup>, Rachel Melhado<sup>12</sup>, Bilal Alkhaffaf<sup>12</sup>, Richard Krysztopik<sup>13</sup>, Peter Lamb<sup>14</sup>, Lucy Culliford<sup>1</sup>, Chris Rogers<sup>1</sup>, Benjamin Howes<sup>15</sup>, Katy Chalmers<sup>3</sup>, Sian Cousins<sup>3</sup>, Jackie Elliott, Jenny Donovan<sup>3</sup>, Rachael Heys<sup>1</sup>, Robin A Wickens<sup>1</sup>, Paul Wilkerson<sup>4</sup>, Andrew Hollowood<sup>4</sup>, Christopher Streets<sup>4</sup>, Dan Titcomb<sup>4</sup>, M Lee Humphreys<sup>5</sup>, Tim Wheatley<sup>5</sup>, Grant Sanders<sup>5</sup>, Arun Ariyathenam<sup>5</sup>, Jamie Kelly<sup>8</sup>, Fergus Noble<sup>8</sup>, Graeme Couper<sup>9</sup>, Richard J. E. Skipworth<sup>9</sup>, Chris Deans<sup>9</sup>, Sukhbir Ubhi<sup>10</sup>, Rob Williams<sup>10</sup>, David Bowrey<sup>10</sup>, David Exon<sup>10</sup>, Paul Turner<sup>11</sup>, Vinutha Shetty<sup>11</sup>, Ram Chaparala<sup>12</sup>, Khurshid Akhtar<sup>12</sup>, Naheed Farooq<sup>12</sup>, Simon L. Parsons<sup>13</sup>, Neil T Welch<sup>13</sup>, Rebecca J Houlihan<sup>4</sup>, Joanne Smith<sup>5</sup>, Rachel Schranz<sup>8</sup>, Nicola Rea<sup>9</sup>, Jill Cooke<sup>10</sup>, Alexandra Williams<sup>11</sup>, Carolyn Hindmarsh<sup>12</sup>, Sally Maitland<sup>13</sup>, Lucy Howie<sup>14</sup>, C Paul Barham<sup>4</sup>

## *Affiliations:*

1. Clinical Trials and Evaluation Unit, Bristol Trials Centre, University of Bristol, University Hospitals Bristol NHS Foundation Trust, Bristol, UK
2. Bristol Randomised Trials Collaboration, Bristol Trials Centre, University of Bristol, Bristol, UK
3. Centre for Surgical Research, Population Health Sciences, Bristol Medical School, Bristol, UK
4. Division of Surgery, University Hospitals Bristol NHS Foundation Trust, Bristol, UK
5. Department of Upper Gastrointestinal Surgery, Derriford Hospital, University Hospitals Plymouth NHS Trust, Plymouth, UK
6. Health Economics Bristol, Bristol Medical School, University of Bristol, Bristol, UK
7. Department of Cellular Pathology, North Bristol NHS Trust, Southmead Hospital, Bristol
8. Leicester Royal Infirmary, University Hospitals of Leicester NHS Trust, Leicester, UK

- 1
- 2
- 3 9. Southampton General Hospital, University Hospital Southampton NHS Foundation Trust,
- 4 Southampton, UK
- 5
- 6
- 7 10. City Campus, Nottingham University Hospitals NHS Trust, Nottingham, UK
- 8
- 9 11. Department of Upper GI surgery, Royal Preston Hospital, Lancashire Teaching Hospitals
- 10 NHS Foundation Trust, Preston, UK
- 11
- 12
- 13 12. Department of Oesophago-Gastric Surgery, Salford Royal Hospital, Salford Royal NHS
- 14 foundation Trust, Salford, UK
- 15
- 16
- 17 13. Royal United Hospitals Bath NHS Foundation Trust, Bath, UK
- 18
- 19 14. Department of Surgery, Royal Infirmary of Edinburgh, NHS Lothian, Edinburgh, UK
- 20
- 21 15. University Hospitals Bristol NHS Foundation Trust, Bristol, UK
- 22
- 23
- 24
- 25

26 *\*Corresponding author:*

27  
28 Dr Rachel C. Brierley,

29  
30 [R.Brierley@bristol.ac.uk](mailto:R.Brierley@bristol.ac.uk),

31  
32 Clinical Trials and Evaluation Unit Bristol

33  
34 Bristol Royal Infirmary, Level 7

35  
36 Queen's Building, Marlborough Street

37  
38 Bristol

39  
40 BS2 8HW

41  
42 0117 342 2987

43  
44  
45 **Number of figures: 2**

46  
47  
48 **Number of tables: 0**

49  
50  
51 **Word count: 3479**

## Abbreviations

1  
2  
3  
4  
5  
6 AUGIS- Association of Upper Gastro-Intestinal Surgeons  
7 BRTC- Bristol Randomised Trials Collaboration  
8 BTC- Bristol Trials Centre  
9 ConDuCT-II- Collaboration and innovation for Difficult and Complex randomised controlled  
10 Trials In Invasive procedures  
11 CTEU- Clinical Trials and Evaluation Unit  
12 CTU- Clinical Trials Unit  
13 EORTC- European Organisation for Research and Treatment of Cancer  
14 HRQL- health related quality of life  
15 HTA- Health Technology Assessment  
16 ICER- Incremental Cost-Effectiveness Ratio  
17 INMB- Incremental Net Monetary Benefit  
18 LAO- laparoscopically-assisted oesophagectomy  
19 MDT – multidisciplinary team MFI- multidimensional fatigue inventory  
20 MRC- Medical Research Council  
21 NHS- National Health Service  
22 NIHR- National Institute for Health Research  
23 OO- open oesophagectomy  
24 PIL – patient information leaflet  
25 QA- quality assurance  
26 QALY- quality adjusted life years  
27 QLQ- quality of life questionnaire  
28 QRI - QuinteT Recruitment Intervention  
29 RCT- randomised controlled trial  
30 REC- Research Ethics Committee  
31 TMIO- totally minimally invasive oesophagectomy  
32 UK- United Kingdom  
33 UKCRC- UK Clinical Research Collaboration  
34  
35  
36  
37  
38  
39  
40  
41  
42  
43  
44  
45  
46  
47  
48  
49  
50  
51  
52  
53  
54  
55  
56  
57  
58  
59  
60

**Abstract: (up to approx. 250 words)**

Introduction: Surgery (oesophagectomy), with neoadjuvant chemo(radio)therapy, is the main curative treatment for patients with oesophageal cancer. Several surgical approaches can be used to remove an oesophageal tumour. The Ivor Lewis (two phase procedure) is usually used in the UK. This can be performed as an open oesophagectomy (OO), a laparoscopically-assisted oesophagectomy (LAO) or a totally minimally invasive oesophagectomy (TMIO). All three are performed in the NHS, with LAO and OO the most common. However, there is limited evidence about which surgical approach is best for patients in terms of survival and post-operative health-related quality of life.

Methods and analysis: We will undertake a UK multicentre randomised controlled trial to compare LAO with OO in adult patients with oesophageal cancer. The primary outcome is patient-reported physical function at 3 and 6 weeks post-operatively and 3 months post-randomisation. Secondary outcomes include: post-operative complications, survival, disease recurrence, other measures of quality of life, spirometry, success of patient blinding and quality assurance measures. A cost-effectiveness analysis will be performed comparing LAO with OO. We will embed a randomised IDEAL phase 2b sub-study to evaluate the safety and evolution of the TMIO procedure and a qualitative recruitment intervention to optimise patient recruitment. We will analyse the primary outcome using a multi-level regression model. Patients will be monitored for up to 3 years after their surgery.

Ethics and dissemination: This study received approval from South-West Frenchay Research Ethics Committee. We will submit the results for publication in a peer-reviewed journal.

Trial registration number: ISRCTN10386621



## Article summary

### *Strengths and limitations of this study*

- The ROMIO study will compare laparoscopically-assisted oesophagectomy with open oesophagectomy, which are the procedures most relevant to UK practice.
- We will assess the quality of the surgery, using operative images and pathology.
- The primary outcome (recovery of physical function up to 3 months) considers what matters most to patients about having an oesophagectomy.
- Patients will be blinded to their surgical procedure for 6 days post-operatively (use of large dressings) to achieve an unbiased assessment of pain but it will not be possible to blind patients for the primary outcome.
- ROMIO incorporates a randomised sub-study to collect data on totally minimally invasive oesophagectomy, which is an evolving technique.

For peer review only

## Introduction:

In the UK, about 8900 people are diagnosed with oesophageal cancer each year and the incidence is increasing [1]. Surgical removal of the oesophagus (oesophagectomy), with or without chemo(radio)therapy, is currently the most commonly recommended treatment for patients whose cancer is confined to the oesophagus and the local lymph nodes and who are fit to undergo major surgery. The objective of treatment is a surgical cure but only about 40 to 50% of patients survive for 3 years or more following treatment [1]. The surgical procedure depends on the location and size of the tumour and individual surgeon choice. There are a number of different surgical approaches used in the NHS, but the most commonly used procedure involves removing the bottom part of the oesophagus and part of the top of the stomach (the two-phase Ivor Lewis oesophagectomy). The remaining stomach is fashioned into a tube and brought up into the chest to replace the removed oesophagus.

In the past 10 years there has been an increase in the use of minimally invasive surgical techniques and, according to the latest Association of Upper Gastro-Intestinal Surgeons (AUGIS) audit, 42% of oesophagectomies were performed using Laparoscopically-Assisted Oesophagectomy (LAO) or Totally Minimally Invasive Oesophagectomy (TMIO)[2]. However, it is uncertain whether laparoscopic surgery improves patient recovery after surgery or has any impact on survival.

Observational studies suggest that TMIO achieves the same survival benefit as Open Oesophagectomy (OO) but with better recovery and reduced rates of post-operative pneumonia [3-5], although the apparent faster recovery may be due to the selection of fitter patients for the minimally invasive procedure. To date, seven randomised controlled trials (RCTs) comparing OO with LAO (n=2) or TMIO (n=4) or robot-assisted TMIO (n=1) have been conducted[6-12]. All had modest sample sizes (26-221 patients) and five out of the seven studies were conducted in a single centre (China = 3, Austria = 1, Netherlands = 1). The studies measured short term primary outcomes such as pulmonary infection (n=2)[7, 9],

1  
2  
3 post-operative complications (n=4)[6, 10-12] and duration of operation (n=1)[8]. In one RCT,  
4 patients were randomised to a surgeon rather than procedure, meaning the treatment effect  
5 may be influenced by a difference in skill between surgeons choosing LAO and those  
6 choosing OO [11]. All but one of the RCTs[12] were at unclear risk of selection bias, either  
7 due to random sequence generation (n=3) or allocation concealment (n=6). The best  
8 evidence comes from two multicentre RCTs, the MIRO and TIME trials. MIRO randomised  
9 207 participants in twelve French centres. Patients were randomised to OO (n=104) or LAO  
10 (n=103). They compared intra-operative and post-operative complications, classified as  
11 grade 2 or above using Clavien-Dindo, within 30 days. There was a lower incidence of  
12 complications in those allocated to LAO (36%) compared to those allocated to open  
13 oesophagectomy (64%, odds ratio [OR] 0.31, 95% CI 0.18-0.55) However, patients were  
14 randomised using opaque envelopes in theatre after a pre-operative laparoscopic  
15 investigation [10]. The TIME trial, conducted in five European centres, compared TMIO with  
16 OO in 115 patients [7] and reported a 70% reduction in pulmonary infection in the TMIO  
17 group in the first 2 weeks post-operatively (relative risk [RR] 0.30, 95% CI 0.12-0.76).[7]  
18 However, the TMIO procedure is not well-established in the UK.[13]

19  
20  
21  
22  
23  
24  
25  
26  
27  
28  
29  
30  
31  
32  
33  
34  
35  
36  
37  
38  
39  
40  
41 We are conducting a large, multicentre RCT (the ROMIO trial) to compare the clinical and  
42 cost-effectiveness of LAO vs OO. The trial will provide high quality evidence, relevant to UK  
43 practice, of the risks and benefits of LAO, in terms of recovery, health-related quality of life  
44 (HRQL), cost and survival. Incorporated into the study are:

- 45 • An assessment of the quality of the surgery performed using intra-operative photos  
46 of the procedure and pathology reports[14]
- 47 • An integrated qualitative QuinteT Recruitment Intervention (QRI) to optimise  
48 recruitment[15]

- 1
  - 2
  - 3
  - 4
  - 5
  - 6
  - 7
  - 8
  - 9
  - 10
  - 11
  - 12
  - 13
  - 14
  - 15
  - 16
  - 17
  - 18
  - 19
  - 20
  - 21
  - 22
  - 23
  - 24
  - 25
  - 26
  - 27
  - 28
  - 29
  - 30
  - 31
  - 32
  - 33
  - 34
  - 35
  - 36
  - 37
  - 38
  - 39
  - 40
  - 41
  - 42
  - 43
  - 44
  - 45
  - 46
  - 47
  - 48
  - 49
  - 50
  - 51
  - 52
  - 53
  - 54
  - 55
  - 56
  - 57
  - 58
  - 59
  - 60
- A randomised IDEAL 2b sub-study to investigate the safety and technical changes in TMIO[16]

For peer review only

## Methods and analysis:

We have used the SPIRIT reporting guidelines in this protocol paper.[17]

### Study design

ROMIO is a multicentre randomised controlled trial (RCT) comparing open oesophagectomy (OO) with laparoscopically-assisted oesophagectomy (LAO) in patients with oesophageal cancer. ROMIO will also include a randomised sub-study in two centres to assess the efficacy of TMIO and review safety data, compared with OO and LAO. The sub-study will also document how the technical aspects of TMIO evolve over time and whether the technique 'stabilises' over the course of ROMIO.

### *Entry criteria*

To ensure comparability between centres and surgeons, centres will only be included if they are undertaking at least 50 oesophagectomies per year and have a minimum of two surgeons participating in ROMIO. Surgeons will be assessed (by electronically submitting two unedited anonymised videos to the ROMIO study imaging team) before they will be permitted to enrol their patients for ROMIO. Further details about this quality assurance (QA) measure has been described previously.[14]

### *Inclusion criteria*

We will screen all patients undergoing oesophagectomy (with or without neoadjuvant chemo(radio)therapy) in at least eight UK hospitals for eligibility (see Figure 1). We will include patients who are at least 18 years old, with at least adenocarcinoma or squamous cell cancer of the oesophagus or oesophago-gastric junction, who have been referred for oesophagectomy by the multidisciplinary team after neoadjuvant chemotherapy or chemoradiotherapy (any type). Patients will be included if their tumour is localised (has not spread beyond the local lymph nodes), is more than 5 cm below the crico-pharyngeus (the muscle that keeps the oesophagus shut) and involves less than 4 cm of the stomach wall.

1  
2  
3 Patients will only be included if they have been assessed as fit for surgery and are able to  
4 provide written informed consent.  
5  
6

### 7 8 *Exclusion criteria* 9

10 Patients will be excluded if they have high-grade dysplasia or if the cancer has spread  
11 beyond the oesophagus (T4b) or any stage with M1. All patients must be eligible for either  
12 open or minimally invasive surgery and must not be taking part in any other research that  
13 would interfere with the ROMIO protocol.  
14  
15  
16  
17

### 18 19 20 21 *Randomisation* 22

23 The local research team will take written informed consent from participants. They will then  
24 randomise participants up to 2 weeks before their operation using a secure internet-based  
25 randomisation system. A computer programme will be used to generate the allocation  
26 sequence used for randomisation. Randomisation will be stratified by neoadjuvant treatment  
27 and site. Randomisation within blocks of varying size will prevent large imbalances in the  
28 number of patients in each treatment group. Participants will be randomised to receive either  
29 OO or LAO in a 1:1 ratio (with a varying block size of 6 or 8). In two centres, patients may  
30 also be randomised to receive TMIO, in a 1:1:1 ratio (with a varying block size of 6 or 9).  
31 The surgical team will be informed of the patient allocation after randomisation and before  
32 surgery (see Figure 1).  
33  
34  
35  
36  
37  
38  
39  
40  
41  
42  
43  
44  
45  
46

### 47 48 49 50 *Trial interventions* 51

52 The intervention being compared in ROMIO is the surgical approach, i.e. whether the  
53 surgeon uses large (OO) or smaller incisions (LAO or TMIO) to perform the operation (see  
54 Figure 2). Internally, the operation being performed is expected to be the same, regardless  
55 of the surgical approach used. Placement of a feeding jejunostomy or naso-jejunal tube will  
56 also at the surgeon's discretion, as well as the use of intra-abdominal and intra-thoracic  
57  
58  
59  
60

1  
2  
3 drains. Details of the surgical technique were established during the feasibility study and as  
4 part of the embedded QA study and are intended to be pragmatic.[14, 18] OO will be  
5 performed using large incisions in both the abdomen and the chest (see Figure 2); the  
6 location and length of incisions are at each surgeon's discretion. LAO will be performed  
7 laparoscopically using 5mm and/or 12mm incisions (as many as needed, according to  
8 surgeon preference) in the abdomen. One large incision will be made in the chest (see  
9 Figure 2). If a feeding jejunostomy tube is placed, this may be performed laparoscopically or  
10 by creating an abdominal incision (no bigger than 8cm). In the two centres participating in  
11 the sub-study, around 33% of patients will have a TMIO. In this approach, the surgeon will  
12 make small incisions in the abdomen and in the chest. For the abdominal part of the  
13 procedure, laparoscopic techniques will be used as described above. The surgeon will  
14 access the thoracic cavity using 12mm and/or 5mm incisions (as many as needed) and  
15 perform the surgery thoracoscopically (see Figure 2).

16  
17  
18  
19  
20  
21  
22  
23  
24  
25  
26  
27  
28  
29  
30  
31  
32  
33 Procedures to minimise diaphragmatic herniation (where one or more of the abdominal  
34 organs moves into the chest) can be performed at the surgeon's discretion. The  
35 anastomotic technique and methods to close the incisions are at the surgeon's discretion.  
36 Any deviations from the specified procedures must be fully documented and will be reviewed  
37 by the study management group.

38  
39  
40  
41  
42  
43  
44  
45 All surgical interventions will be carried out under general anaesthesia according to local  
46 hospital protocols. Patients will receive antibiotics and deep vein thrombosis prophylaxis  
47 according to local hospital policies. Co-interventions such as peri-operative analgesia (e.g.  
48 epidural anaesthesia or paravertebral catheters) and monitoring (e.g. central or arterial lines)  
49 will be permitted according to the preferences of each centre.

50  
51  
52  
53  
54  
55  
56  
57  
58 Participants have the right to discontinue their part in the study at any time. In addition, the  
59 investigator may withdraw the participant from their allocated treatment group if, subsequent  
60

1  
2  
3 to randomisation, a clinical reason for not performing the surgical intervention is discovered.  
4  
5 Participants withdrawn from their allocated intervention but willing to continue completing  
6  
7 follow-up schedules will be encouraged to do so. All discontinuations and withdrawals will be  
8  
9 documented.  
10

### 11 12 13 *Primary outcome*

14  
15 The primary outcome is recovery of physical function assessed using the established,  
16  
17 validated patient-reported European Organisation for Research and Treatment of Cancer  
18  
19 quality of life questionnaire (EORTC-QLQ-C30) at three and six weeks post-surgery and  
20  
21 three months after randomisation[19]. This quality of life measure was selected as the key  
22  
23 benefits of minimally invasive surgical techniques are the potential for less tissue damage  
24  
25 and consequently less pain and a more rapid recovery of function.[20] Patient groups also  
26  
27 indicated that quality of life is an outcome that is very important to them.  
28  
29  
30

### 31 32 33 *Secondary outcome measures*

34  
35 Secondary outcomes will assess the efficacy of the OO and LAO in terms of morbidity,  
36  
37 survival and safety. Secondary outcomes will include:  
38

#### 39 *Survival*

- 40  
41 • Overall and disease-free survival for at least 2-years.

#### 42 43 *Complications*

- 44  
45 • All-cause short and long-term complications for up to 3 years post-randomisation[21].
- 46  
47 • Any complications within 30 days of surgery, as assessed using the Clavien-Dindo  
48  
49 System.[22]
- 50  
51 • Length of hospital stay (defined as length of primary hospital stay plus readmission  
52  
53 within 30 days / length of primary hospital stay plus length of hospital stay if  
54  
55 discharged to community hospital).  
56  
57  
58  
59  
60



- Forced expiratory volume in one second and forced vital capacity measured by spirometry, measured at baseline and days 3 and 6 post-operatively.

#### *Cost-effectiveness*

- Incremental net monetary benefit of LAO over OO 2 years after surgery.

#### *Quality of life*

- We will measure generic and disease specific aspects of HRQL using the following validated questionnaires at baseline, 6 days, 3 weeks and 6 weeks post-surgery and 3, 6, 9, 12, 18, 24 and, where possible, 36 months post-randomisation:
  - EORTC QLQ-C30[19] – a questionnaire developed to assess the health-related quality of life of cancer patients;
  - EORTC QLQ-OES18[23, 24]– a questionnaire developed to assess the health-related quality of life for oesophageal cancer patients;
  - MFI-20 [25, 26]– a tool widely used to assess fatigue in cancer patients;
  - EuroQOL EQ-5D-5L [27, 28] –a widely used generic quality of life questionnaire.

We will also measure pain pre-operatively and post-operatively at days 3 and 6 using the visual analogue scale (VAS)[29].

#### *Quality assurance*

We will assess QA of surgery (reported previously[14]) using:

- Intra-operative photographs will be taken at key stages throughout each procedure and submitted to the study database for on-going monitoring of the operations. Anonymised images will be reviewed and rated by surgical assessors.
- Histopathological measures assessed by pathologists blinded to the treatment allocation, including length of the oesophagus; total counts of nodes – all and malignant (positive) nodes; details of resection margins and pT staging. The slides of 10% of all cases from each centre will be reviewed by the lead pathologist.
- Success of patient blinding during the first six days post-operatively, assessed using the Bang blinding procedure[30]

1  
2  
3 Outcome data will be collected onto case report forms (unless questionnaires are specified)  
4  
5 and entered onto a study-specific database for data cleaning and analysis.

6  
7 Data about adverse events will be collected and reported in accordance with Sponsor and  
8  
9 regulatory requirements.  
10

### 11 12 13 14 *Patient and Public Involvement*

15  
16 Patient groups were consulted at the design stage, these feedback from these patient  
17  
18 consultations shaped the primary outcome and other aspects of the study. We have patient  
19  
20 representatives as grant co-applicants and as independent members of the trial steering  
21  
22 committee, in addition to this we will regularly consult patient and public groups about  
23  
24 different aspects of the study as it is ongoing. Patients have provided feedback on the  
25  
26 burden involved in participating in the research.  
27  
28  
29  
30

### 31 32 *Methods used to minimise bias*

33  
34 Patients will be blinded to their treatment allocation by covering all potential incision sites for  
35  
36 all surgical approaches (regardless of the actual operation performed) with large dressings  
37  
38 for the first 6 days post-operatively. On day 6 patients will be asked to complete a booklet  
39  
40 containing all of the quality of life questionnaires (QLQ-C30, OES-18, MFI-20, EQ5D5L) and  
41  
42 a pain assessment using the VAS. Success of blinding will be assessed using the Bang  
43  
44 Blinding Index.[30] Due to the nature of the study intervention, it is not possible to blind  
45  
46 patients for the completion of the quality of life questionnaires at the primary outcome  
47  
48 timepoints. However, patients have not had this surgery before so will not have anything to  
49  
50 compare it to, furthermore, participants in the study are unlikely to have a strong preference  
51  
52 for one approach over another.  
53  
54  
55

56  
57 Pathologists assessing QA of surgery will also be blinded to the randomised allocation. As  
58  
59 the intervention is surgery, there may be variation in surgeon skill or surgical technique. This  
60

1  
2  
3 will be managed by stratifying the randomisation by centre. Surgical QA is described in more  
4  
5 detail elsewhere.[14]  
6  
7  
8

9 Loss to follow up will be minimised by maintaining regular contact with patients (by  
10  
11 telephone and post) to complete follow-up questionnaires. No additional visits are required  
12  
13 for the study.  
14  
15

### 16 17 18 19 *Sample size*

20  
21 203 participants in each of the LAO and OO groups will allow a minimum clinically important  
22  
23 difference of 0.4 standard deviations on the primary outcome to be detected with more than  
24  
25 90% power at the 5% significance level, allowing for 15% of participants not following their  
26  
27 allocated procedure, and 10% failing to complete the primary outcome. We anticipate that  
28  
29 approximately 40 additional patients will be randomised to TMIO in the nested IDEAL 2b  
30  
31 sub-study to allow us to describe and evaluate changes in technique.  
32  
33  
34  
35  
36

### 37 38 *Statistical analysis*

39  
40 The results will be reported according to the CONSORT guidelines, including the extension  
41  
42 for patient reported outcomes.[31] We will analyse the data according to the intention to treat  
43  
44 principle, in that the groups compared will be based on allocated treatment irrespective of  
45  
46 the actual operation that the patient had. Participants missing all three assessments  
47  
48 contributing to the primary outcome measure will not be included in the primary analysis, but  
49  
50 we will use sensitivity analyses to investigate the potential impact of any missing data. We  
51  
52 will adjust analyses for treatment centre, whether the participant underwent neoadjuvant  
53  
54 chemo(radio)therapy and the baseline value of the outcome under comparison. We will  
55  
56 prepare and make publicly available a detailed analysis plan prior to locking the database.  
57  
58  
59  
60

1  
2  
3 The primary outcome measure (difference between LAO and OO treatment groups) will be  
4 the reported difference in mean EORTC-QLQ-C30 scores for recovery of physical function  
5 (with 95% confidence interval and p-value). The difference in mean scores will be estimated  
6 as the co-efficient of a binary variable distinguishing the two treatment groups, in a multi-  
7 level regression model, with covariates as detailed. This analysis will be conducted  
8 separately for data from the feasibility and main trials, and the two treatment effect estimates  
9 pooled as a weighted average. The same approach will be adapted to the assessment of  
10 pain during the six days post-operatively and other measures of HRQL.  
11  
12

13  
14 In addition, we will compare post-operative length of stay and accommodate the skewed  
15 distribution of this measure by a log-transformed analysis model presenting ratios of  
16 geometric means, 95% confidence interval and p-value.  
17  
18

19 We will present frequencies of the key treatment complications by treatment allocation.

20  
21 Severity of treatment complications will be compared between allocated treatment groups by  
22 scoring each patient according to their most severe Clavien-Dindo category and estimating  
23 the difference as an odds ratio using ordered logistic regression.  
24  
25

26 We will use proportional hazards regression to estimate the treatment difference in overall  
27 and disease-free survival. A Kaplan-Meier plot will present survival over time in the OO and  
28 LAO groups.  
29  
30

### 31 *Subgroup analyses*

32 A sub-group analysis will investigate whether the relative effects of OO and LAO differ  
33 according to whether a participant underwent neoadjuvant chemotherapy /  
34 chemoradiotherapy beforehand.  
35  
36

### 37 *Analysis of the nested IDEAL 2b study*

38 Data about the TMIO group will be collected and reported separately to the comparison  
39 between the OO and LAO groups, these patients will not be included in the main analysis.  
40  
41  
42  
43  
44  
45  
46  
47  
48  
49  
50  
51  
52  
53  
54  
55  
56  
57  
58  
59  
60

1  
2  
3 We will document the inclusion / exclusion of patients for the TMIO procedure and any  
4 reasons for not performing the TMIO operation according to the randomised allocation. We  
5 will document the complications of TMIO and perform some analyses of safety and adverse  
6 events compared with the OO and LAO groups. We will document the evolution of the  
7 technical aspects of this procedure according to the IDEAL 2b framework.  
8  
9  
10  
11  
12

### 13 *Cost-effectiveness analysis*

14  
15 We will convert EQ-5D-5L [18, 19] responses to utilities using the NICE-recommended UK  
16 tariff at the time of analysis.[32] These will be combined with survival data to calculate  
17 QALYs, adjusted for differences in baseline EQ-5D utility scores.[33] We will estimate  
18 theatre costs by collecting detailed information on equipment used and staff time (e.g.  
19 surgeons, anaesthetist, scrub nurse). We will collect information on intensive care resource  
20 use and re-interventions during the initial hospital stay. We will also collect and analyse data  
21 on health care resources used in subsequent inpatient stays, outpatient visits, general  
22 practitioner visits and other community health services. We will use nationally available unit  
23 costs to value resource use where available.  
24  
25  
26  
27  
28  
29  
30  
31  
32  
33  
34  
35  
36  
37  
38  
39

40 We will perform the cost-effectiveness analysis on an intention to treat basis from both an  
41 NHS perspective, and a wider personal and social care perspective. We will estimate the  
42 cost-effectiveness of LAO compared with OO by calculating the Incremental Net Monetary  
43 Benefit (INMB) and, if appropriate, the Incremental Cost-Effectiveness Ratio (ICER). We will  
44 present uncertainty in these estimates using a cost-effectiveness acceptability curve and/or  
45 cost-effectiveness ellipses. We will perform cost analyses at 3 and 24 months post-  
46 randomisation. At 24 months, we will discount the cost estimates at the rate recommended  
47 by HM Treasury at the time of analysis.[34] We will conduct one-way sensitivity analyses  
48 including varying the discount rate. Where appropriate, we will use simple or multiple  
49 imputation techniques for missing data.  
50  
51  
52  
53  
54  
55  
56  
57  
58  
59  
60

### **Ethics and dissemination:**

All study interventions are already routinely used in the NHS. This study has been reviewed and given favourable opinion by the South West - Frenchay Research Ethics Committee on 25<sup>th</sup> April 2016 (REC, study ref: 184167). We will disseminate the findings by usual academic channels, i.e. presentation at international meetings and peer-reviewed publications. We will write a full report for the funder on the completion of the study and we will provide a lay summary of the results to patient organisations.

### *Study progress*

Recruitment started in October 2016 and we have recruited 277 patients, with an additional 32 TMIO patients (correct on 03 Apr 2019). We have agreed with the funder to continue recruitment until September 2019, beyond the planned completion of recruitment in November 2018. We will also include approximately 120 patients recruited to the feasibility study, having secured permission to continue recruitment to that study whilst the main trial was being set up.

### *Major changes to the study protocol*

Since the first study protocol was approved by the REC (the current version is v7.0, 25 October 2018), we have made the following changes:

- We updated the expected adverse events section to reflect the results of an international consensus paper on standardising reporting of complications of oesophagectomy[21] and to clarify that we will not collect events related to chemotherapy.
- We included information about plans to link with external registries (Intensive Care National Audit Research Centre, Public Health England, Information Services Division) to obtain more detailed data about ROMIO patient care in hospitals, for the

1  
2  
3 purpose of economic analysis and to capture information on acute post-operative  
4  
5 complications and recovery.  
6

### 7 **Figure legends**

8  
9 Figure 1 CONSORT diagram outline (MDT: multi-disciplinary team; PIL: patient information  
10 leaflet; MIO: minimally invasive oesophagectomy; LAO: laparoscopically-assisted  
11 oesophagectomy; OO: open oesophagectomy)  
12

13 Figure 2 Diagrams representing the incisions the surgeon may make for the three different  
14 surgical approaches  
15  
16  
17  
18  
19  
20  
21  
22  
23  
24  
25  
26  
27  
28  
29  
30  
31  
32  
33  
34  
35  
36  
37  
38  
39  
40  
41  
42  
43  
44  
45  
46  
47  
48  
49  
50  
51  
52  
53  
54  
55  
56  
57  
58  
59  
60

For peer review only

## References

1. CRUK, C.R. *About oesophageal cancer*. 2018; Available from: <https://www.cancerresearchuk.org/about-cancer/oesophageal-cancer/about>.
2. Varagunam M, P.M., Sinha S, Cromwell D, Maynard N, Crosby T, Trudgill N, Michalowski J, Napper R, *National Oesophago-Gastric Cancer Audit, 2018*. London: Royal College of Surgeons of England, 2018.
3. Naftoux, P., et al., *Minimally invasive oesophagectomy: a valuable alternative to open oesophagectomy for the treatment of early oesophageal and gastro-oesophageal junction carcinoma*. Eur J Cardiothorac Surg, 2011. **40**(6): p. 1455-63; discussion 1463-4.
4. Sihag, S., et al., *Comparison of perioperative outcomes following open versus minimally invasive Ivor Lewis oesophagectomy at a single, high-volume centre*. Eur J Cardiothorac Surg, 2012. **42**(3): p. 430-7.
5. Tsujimoto, H., et al., *Video-assisted thoracoscopic surgery for esophageal cancer attenuates postoperative systemic responses and pulmonary complications*. Surgery, 2012. **151**(5): p. 667-73.
6. van der Sluis, P.C.M.D.P.M., et al., *Robot-assisted Minimally Invasive Thoracoscopic Esophagectomy Versus Open Transthoracic Esophagectomy for Resectable Esophageal Cancer: A Randomized Controlled Trial*. Annals of Surgery, 2019. **269**(4): p. 621-630.
7. Biere, S.S., et al., *Minimally invasive versus open oesophagectomy for patients with oesophageal cancer: a multicentre, open-label, randomised controlled trial*. Lancet, 2012. **379**(9829): p. 1887-92.
8. Guo, M., et al., *A comparative study of the therapeutic effect in two protocols: video-assisted thoracic surgery combined with laparoscopy versus right open transthoracic esophagectomy for esophageal cancer management*. Chinese-German J Clin Oncol, 2013. **12**(2): p. 68-71.
9. Hong, L., et al., *The Short-Term Outcome of Three-Field Minimally Invasive Esophagectomy for Siewert Type I Esophagogastric Junctional Adenocarcinoma*. Ann Thorac Surg, 2013. **96**: p. 1826-32.
10. Mariette, C., et al., *Hybrid Minimally Invasive Esophagectomy for Esophageal Cancer*. N Engl J Med, 2019. **380**(2): p. 152-162.
11. Ma, G., et al., *Comparison of the short-term clinical outcome between open and minimally invasive esophagectomy by comprehensive complication index*. J Cancer Res Ther, 2018. **14**(4): p. 789-794.
12. Paireder, M., et al., *Morbidity in open versus minimally invasive hybrid esophagectomy (MIOMIE): Long-term results of a randomized controlled clinical study*. Eur Surg, 2018. **50**(6): p. 249-255.
13. Varagunam, M., et al., *National OesophagoGastric Cancer Audit*. 2017.
14. Blencowe, N.S., et al., *Protocol for developing quality assurance measures to use in surgical trials: an example from the ROMIO study*. BMJ Open, 2019. **9**(3): p. e026209.
15. Donovan, J.L., et al., *Optimising recruitment and informed consent in randomised controlled trials: the development and implementation of the Quintet Recruitment Intervention (QRI)*. Trials, 2016. **17**(1): p. 283.
16. Hirst, A., et al., *No Surgical Innovation Without Evaluation: Evolution and Further Development of the IDEAL Framework and Recommendations*. Annals of Surgery, 2019. **269**(2): p. 211-220.
17. Chan, A.W., et al., *SPIRIT 2013 statement: defining standard protocol items for clinical trials*. Ann Intern Med, 2013. **158**(3): p. 200-7.
18. Avery, K.N., et al., *The feasibility of a randomized controlled trial of esophagectomy for esophageal cancer--the ROMIO (Randomized Oesophagectomy: Minimally Invasive or Open) study: protocol for a randomized controlled trial*. Trials, 2014. **15**: p. 200.



19. Aaronson, N.K., et al., *The European Organization for Research and Treatment of Cancer QLQ-C30: a quality-of-life instrument for use in international clinical trials in oncology*. J Natl Cancer Inst, 1993. **85**(5): p. 365-76.
20. Veldkamp, R., et al., *Laparoscopic surgery versus open surgery for colon cancer: short-term outcomes of a randomised trial*. Lancet Oncol, 2005. **6**(7): p. 477-84.
21. Low, D.E., et al., *International Consensus on Standardization of Data Collection for Complications Associated With Esophagectomy: Esophagectomy Complications Consensus Group (ECCG)*. Ann Surg, 2015. **262**(2): p. 286-94.
22. Dindo, D., N. Demartines, and P.A. Clavien, *Classification of surgical complications: a new proposal with evaluation in a cohort of 6336 patients and results of a survey*. Ann Surg, 2004. **240**(2): p. 205-13.
23. Blazeby, J.M., et al., *Clinical and psychometric validation of an EORTC questionnaire module, the EORTC QLQ-OES18, to assess quality of life in patients with oesophageal cancer*. Eur J Cancer, 2003. **39**(10): p. 1384-94.
24. Smithers, B.M., et al., *Comparison of the outcomes between open and minimally invasive esophagectomy*. Ann Surg, 2007. **245**(2): p. 232-40.
25. Parameswaran, R., et al., *Health-related quality of life after minimally invasive oesophagectomy*. Br J Surg, 2010. **97**(4): p. 525-31.
26. Smets, E.M., et al., *The Multidimensional Fatigue Inventory (MFI) psychometric qualities of an instrument to assess fatigue*. J Psychosom Res, 1995. **39**(3): p. 315-25.
27. Clinical Outcomes of Surgical Therapy Study Group, *A comparison of laparoscopically assisted and open colectomy for colon cancer*. N Engl J Med, 2004. **350**(20): p. 2050-9.
28. Herdman, M., et al., *Development and preliminary testing of the new five-level version of EQ-5D (EQ-5D-5L)*. Qual Life Res, 2011. **20**(10): p. 1727-36.
29. Hauser, K. and D. Walsh, *Visual analogue scales and assessment of quality of life in cancer*. J Support Oncol, 2008. **6**(6): p. 277-82.
30. Bang, H., L. Ni, and C.E. Davis, *Assessment of blinding in clinical trials*. Control Clin Trials, 2004. **25**(2): p. 143-56.
31. Calvert, M., et al., *Reporting of patient-reported outcomes in randomized trials: the CONSORT PRO extension*. JAMA, 2013. **309**(8): p. 814-22.
32. NICE. *Guide to the methods of technology appraisal*. 2013 [03 April 2019]; Available from: nice.org.uk/process/pmg9.
33. Manca, A., Hawkins, N, Sculpher, M, *Estimating mean QALYs in trial-based cost-effectiveness analysis: the importance of controlling for baseline utility*. Health Economics, 2005. **14**(5): p. 487-496.
34. Treasury, H., *The Green Book – Central Government Guidance on Appraisal and Evaluation*. 2018.

### Author contributions:

All authors critically revised manuscript for important intellectual content and approved the manuscript.

- Rachel C Brierley developed the study design and aims, drafted the protocol and initiated the study, drafted the manuscript and oversaw study conduct and acquisition of data.

- 1  
2  
3 • Daisy M Gaunt developed the study design and aims, drafted the protocol and  
4 initiated the study. DMG also oversaw statistical aspects and analyses for the study.  
5  
6  
7
- 8  
9 • Chris Metcalfe developed the study concept and obtained grant funding, developed  
10 the study design and aims, drafted the protocol and initiated the study. CM also  
11 oversaw statistical aspects and analyses for the study.  
12  
13  
14
- 15  
16 • Jane M Blazeby developed the study concept and obtained grant funding, developed  
17 the study design and aims, drafted the protocol and initiated the study, oversaw the  
18 embedded quality assurance study and clinical aspects of the study.  
19  
20  
21  
22
- 23  
24 • Natalie S Blencowe developed the study concept and obtained grant funding,  
25 developed the study design and aims, drafted the protocol and initiated the study,  
26 oversaw the embedded quality assurance study.  
27  
28  
29
- 30  
31 • Marcus Jepson developed the study design and aims, drafted the protocol and  
32 initiated the study, oversaw the embedded qualitative study.  
33  
34  
35
- 36  
37 • Richard Berrisford developed the study concept and obtained grant funding,  
38 developed the study design and aims, drafted the protocol and initiated the study.  
39 Principal investigator and acquired data for the study.  
40  
41  
42  
43
- 44  
45 • Kerry N L Avery developed the study concept and obtained grant funding, developed  
46 the study design and aims, drafted the protocol and initiated the study, oversaw  
47 patient and public involvement.  
48  
49  
50
- 51  
52 • Lucy Culliford developed the study design and aims, drafted the protocol and initiated  
53 the study.  
54  
55  
56
- 57  
58 • William Hollingworth developed and oversaw health economic aspects of the study.  
59  
60

- 1
- 2
- 3 • Caoimhe T Rice developed the health economics aspects of the study.
- 4
- 5
- 6
- 7 • Newton Wong developed the study concept and obtained grant funding, developed
- 8 the study design and aims, drafted the protocol and initiated the study and oversaw
- 9 pathology quality assurance in the study.
- 10
- 11
- 12
- 13
- 14 • Aida Moure-Fernandez developed the study design and aims, drafted the protocol
- 15 and initiated the study and developed the health economics aspects of the study.
- 16
- 17
- 18
- 19
- 20 • Joanna Nicklin developed the study design and aims, drafted the protocol and
- 21 initiated the study and acquired data for the study.
- 22
- 23
- 24
- 25 • Anni Skilton developed the study design and aims, drafted the protocol and initiated
- 26 the study and oversaw the embedded quality assurance study.
- 27
- 28
- 29
- 30 • James Byrne was a Principal investigator and acquired data for the study.
- 31
- 32
- 33
- 34 • Tim Underwood was a Principal investigator and acquired data for the study.
- 35
- 36
- 37
- 38 • Peter Lamb was a Principal investigator and acquired data for the study.
- 39
- 40
- 41 • Alex Boddy was a Principal investigator and acquired data for the study.
- 42
- 43
- 44 • Kish Pursnani was a Principal investigator and acquired data for the study.
- 45
- 46
- 47
- 48 • Rachel Melhado was a Principal investigator and acquired data for the study.
- 49
- 50
- 51 • Bilal Alkhaffaf was a Principal investigator and acquired data for the study.
- 52
- 53
- 54 • Ravi Vohra was a Principal investigator and acquired data for the study.
- 55
- 56
- 57 • James Catton was a Principal investigator and acquired data for the study.
- 58
- 59
- 60

- 1
- 2
- 3 • Richard Krysztopik was a Principal investigator and acquired data for the study.
- 4
- 5
- 6
- 7 • Chris Rogers developed the study concept and obtained grant funding, developed
- 8 the study design and aims, drafted the protocol and initiated the study.
- 9
- 10
- 11
- 12 • Benjamin Howes developed the study concept and obtained grant funding,
- 13 developed the study design and aims, drafted the protocol and initiated the study.
- 14
- 15
- 16
- 17 • Katy Chalmers conducted the systematic review.
- 18
- 19
- 20
- 21 • Sian Cousins conducted the systematic review.
- 22
- 23
- 24
- 25 • Jackie Elliott developed the study concept and obtained grant funding and
- 26 contributed to PPI aspects of the study.
- 27
- 28
- 29
- 30 • Jenny Donovan developed the study concept and obtained grant funding, developed
- 31 the study design and aims, drafted the protocol and initiated the study and oversaw
- 32 the embedded qualitative study.
- 33
- 34
- 35
- 36
- 37 • Rachael Heyes conducted the study.
- 38
- 39
- 40
- 41 • Robin Wickens conducted the study.
- 42
- 43
- 44
- 45 • Paul Wilkerson acquired data for the study.
- 46
- 47
- 48 • Andy Hollowood acquired data for the study.
- 49
- 50
- 51 • Christopher Streets acquired data for the study.
- 52
- 53
- 54
- 55 • Dan Titcomb acquired data for the study.
- 56
- 57
- 58 • Lee Humphreys acquired data for the study.
- 59
- 60

- 1
- 2
- 3 • Tim Wheatley acquired data for the study.
- 4
- 5
- 6
- 7 • Grant Sanders acquired data for the study.
- 8
- 9
- 10 • Arun Ariyaratnam acquired data for the study.
- 11
- 12
- 13 • Jamie Kelly acquired data for the study.
- 14
- 15
- 16
- 17 • Fergus Noble acquired data for the study.
- 18
- 19
- 20 • Graeme Couper acquired data for the study.
- 21
- 22
- 23 • Richard J. E. Skipworth acquired data for the study.
- 24
- 25
- 26
- 27 • Chris Deans acquired data for the study.
- 28
- 29
- 30 • Sukhbir Ubhi acquired data for the study.
- 31
- 32
- 33 • Rob Williams acquired data for the study.
- 34
- 35
- 36
- 37 • David Bowrey acquired data for the study.
- 38
- 39
- 40 • David Exon acquired data for the study.
- 41
- 42
- 43 • Paul Turner acquired data for the study.
- 44
- 45
- 46
- 47 • Vinutha Shetty acquired data for the study.
- 48
- 49
- 50 • Ram Chaparala acquired data for the study.
- 51
- 52
- 53 • Khurshid Akhtar acquired data for the study.
- 54
- 55
- 56
- 57 • Naheed Farooq acquired data for the study.
- 58
- 59
- 60

- 1
- 2
- 3 • Simon L. Parsons acquired data for the study.
- 4
- 5
- 6
- 7 • Neil Welch acquired data for the study.
- 8
- 9
- 10 • Rebecca Houlihan developed the study design and aims, drafted the protocol and
- 11 initiated the study and acquired data for the study.
- 12
- 13
- 14
- 15 • Joanne Smith acquired data for the study.
- 16
- 17
- 18
- 19 • Rachel Schranz acquired data for the study.
- 20
- 21
- 22 • Nicola Rea acquired data for the study.
- 23
- 24
- 25
- 26 • Jill Cooke acquired data for the study.
- 27
- 28
- 29 • Alexandra Williams acquired data for the study.
- 30
- 31
- 32 • Carolyn Hindmarsh acquired data for the study.
- 33
- 34
- 35
- 36 • Sally Maitland acquired data for the study.
- 37
- 38
- 39 • Lucy Howie acquired data for the study.
- 40
- 41
- 42 • C Paul Barham developed the study concept and obtained grant funding, developed
- 43 the study design and aims, drafted the protocol and initiated the study, oversaw
- 44 clinical aspects of the study, oversaw the embedded quality assurance study and
- 45 was Chief Investigator for the study.
- 46
- 47
- 48
- 49
- 50

### 51 **Acknowledgements:**

52  
53 We would like to thank the large teams at each hospital who work on the ROMIO  
54 study. The hospitals involved with ROMIO are: University Hospitals Bristol NHS  
55 Foundation Trust, Bristol, England; University Hospitals Plymouth NHS Trust,  
56 Plymouth, England; University Hospital Southampton NHS Foundation Trust,  
57 Southampton, England; NHS Lothian, Edinburgh, Scotland; University Hospitals of  
58 Leicester NHS Trust, Leicester, England; Lancashire Teaching Hospitals NHS  
59 Foundation Trust, Preston, England; Salford Royal NHS Foundation Trust,  
60

1  
2  
3 Manchester, England; Nottingham University Hospitals NHS Trust, Nottingham,  
4 England; Royal United Hospitals Bath NHS Foundation Trust, Bath, England. We  
5 would also like to thank Maria Pufulete, Madeleine Clout and Kate Harris for  
6 commenting on the draft manuscript.  
7

8  
9 This study was sponsored by University Hospitals Bristol NHS Foundation Trust,  
10 Research and Innovation, Level 3, UH Bristol Education and Research Centre,  
11 Upper Maudlin Street, Bristol BS2 8AE.  
12

13 The study is overseen by an independent steering committee and an independent  
14 data monitoring committee.  
15

16  
17 Steering Committee membership: Craig Ramsay (Chair, Professor in Health  
18 Services Research, University of Aberdeen, Scotland); Tony Ingold (Trustee,  
19 Oesophageal Patients Association, England); Heike Grabsch (Professor of  
20 Gastrointestinal Pathology, Maastricht University, Netherlands); William Allum  
21 (Consultant Upper Gastrointestinal Surgeon, Royal Marsden NHS Foundation Trust,  
22 London, England); Richard Hardwick (Consultant Upper Gastrointestinal Surgeon &  
23 Lead Clinician for Upper GI Cancer, Cambridge University Hospitals NHS FT,  
24 Cambridge, England); Colin Green (Professor of Health Economics, University of  
25 Exeter, Exeter, England); Helen Marshall (Principal Statistician, University of Leeds,  
26 Leeds, England).  
27  
28

29  
30 Data Monitoring Committee membership: Judith Bliss (Chair, Professor of Clinical  
31 Trials, Institute of Cancer Research, London, England); William Robb (Consultant  
32 Upper Gastrointestinal Surgeon, Beaumont Hospital & Royal College of Surgeons in  
33 Ireland, Dublin, Ireland); Derek Alderson (President of the Royal College of  
34 Surgeons and emeritus Professor of Surgery, University of Birmingham,  
35 Birmingham, England).  
36

### 37 **Funding statement:**

38  
39 This research was funded by the National Institute for Health Research (NIHR)  
40 Health Technology Assessment (HTA) programme (project number 14/140/78).  
41  
42

43 We also received funding support from the Bristol Biomedical Research Centre, the  
44 Medical Research Council (MRC) ConDuCT-II (Collaboration and innovation for  
45 Difficult and Complex randomised controlled Trials In Invasive procedures) Hub for  
46 Trials Methodology Research (MR/K025643/1) and the NIHR Biomedical Research  
47 Centre at University Hospitals Bristol NHS Foundation Trust and the University of  
48 Bristol.  
49

50  
51 This study was designed and delivered in collaboration with the Clinical Trials and  
52 Evaluation Unit (CTEU) and the Bristol Randomised Trials Collaboration (BRTC),  
53 both are UKCRC registered clinical trials units, which are known collectively as the  
54 Bristol Trials Centre (BTC), and receive National Institute for Health Research  
55 Clinical Trials Unit (CTU) support funding.  
56  
57

58 Department of Health Disclaimer:  
59  
60

1  
2  
3 The views and opinions expressed therein are those of the authors and do not  
4 necessarily reflect those of the HTA programme, NIHR, NHS or the Department of  
5 Health.  
6

7  
8 The funder and Sponsors approve any amendments to the study but have no direct  
9 involvement in study design; collection, management, analysis, and interpretation of  
10 data; writing of the report; and the decision to submit this report for publication.  
11

## 12 **Competing interests statement**

13  
14 No competing interests are declared  
15

## 16 **Data Sharing**

17  
18 Data will not be made available for sharing until after publication of the main results of the  
19 research. Thereafter, anonymised individual patient data will be made available for  
20 secondary research, conditional on assurance from the secondary researcher that the  
21 proposed use of the data is compliant with the MRC Policy on Data Preservation and  
22 Sharing regarding scientific quality, ethical requirements and value for money. A minimum  
23 requirement with respect to scientific quality will be a publicly available pre-specified protocol  
24 describing the purpose, methods and analysis of the secondary research, e.g. a protocol for  
25 a Cochrane systematic review. The second file containing patient identifiers would be made  
26 available for record linkage or a similar purpose, subject to confirmation that the secondary  
27 research protocol has been approved by a UK REC or other similar, approved ethics review  
28 body.  
29  
30  
31  
32  
33  
34  
35  
36  
37  
38  
39  
40  
41  
42  
43  
44  
45  
46  
47  
48  
49  
50  
51  
52  
53  
54  
55  
56  
57  
58  
59  
60





Figure 1 CONSORT diagram outline (MDT: multi-disciplinary team; PIL: patient information leaflet; MIO: minimally invasive oesophagectomy; LAO: laparoscopically-assisted oesophagectomy; OO: open oesophagectomy)

Figure 1 CONSORT diagram outline (MDT: multi-disciplinary team; PIL: patient information leaflet; MIO: minimally invasive oesophagectomy; LAO: laparoscopically-assisted oesophagectomy; OO: open oesophagectomy)

190x275mm (300 x 300 DPI)



A. Open oesophagectomy (OO)



B. Laparoscopically assisted oesophagectomy (LAO)



C. Totally minimally invasive oesophagectomy (TMIO)

Figure 2 Diagrams representing the incisions the surgeon may make for the three different surgical approaches

Figure 2 Diagrams representing the incisions the surgeon may make for the three different surgical approaches

293x358mm (300 x 300 DPI)

# Reporting checklist for protocol of a clinical trial.

Based on the SPIRIT guidelines.

## Instructions to authors

Complete this checklist by entering the page numbers from your manuscript where readers will find each of the items listed below.

Your article may not currently address all the items on the checklist. Please modify your text to include the missing information. If you are certain that an item does not apply, please write "n/a" and provide a short explanation.

Upload your completed checklist as an extra file when you submit to a journal.

In your methods section, say that you used the SPIRIT reporting guidelines, and cite them as:

Chan A-W, Tetzlaff JM, Altman DG, Laupacis A, Gøtzsche PC, Krleža-Jerić K, Hróbjartsson A, Mann H, Dickersin K, Berlin J, Doré C, Parulekar W, Summerskill W, Groves T, Schulz K, Sox H, Rockhold FW, Rennie D, Moher D. SPIRIT 2013 Statement: Defining standard protocol items for clinical trials. *Ann Intern Med.* 2013;158(3):200-207

|                                             |                     | Reporting Item                                                                                               | Page Number                                                |
|---------------------------------------------|---------------------|--------------------------------------------------------------------------------------------------------------|------------------------------------------------------------|
| Title                                       | <a href="#">#1</a>  | Descriptive title identifying the study design, population, interventions, and, if applicable, trial acronym | 1                                                          |
| Trial registration                          | <a href="#">#2a</a> | Trial identifier and registry name. If not yet registered, name of intended registry                         | 4                                                          |
| Trial registration: data set                | <a href="#">#2b</a> | All items from the World Health Organization Trial Registration Data Set                                     | All relevant information is included throughout the paper. |
| Protocol version                            | <a href="#">#3</a>  | Date and version identifier                                                                                  | 17                                                         |
| Funding                                     | <a href="#">#4</a>  | Sources and types of financial, material, and other support                                                  | 21-22                                                      |
| Roles and responsibilities: contributorship | <a href="#">#5a</a> | Names, affiliations, and roles of protocol contributors                                                      | 1-2, 20-21                                                 |

|    |                      |                     |                                                    |     |
|----|----------------------|---------------------|----------------------------------------------------|-----|
| 1  | Roles and            | <a href="#">#5b</a> | Name and contact information for the trial         | 21  |
| 2  | responsibilities:    |                     | sponsor                                            |     |
| 3  | sponsor contact      |                     |                                                    |     |
| 4  | information          |                     |                                                    |     |
| 5  |                      |                     |                                                    |     |
| 6  |                      |                     |                                                    |     |
| 7  | Roles and            | <a href="#">#5c</a> | Role of study sponsor and funders, if any, in      | 22  |
| 8  | responsibilities:    |                     | study design; collection, management,              |     |
| 9  | sponsor and          |                     | analysis, and interpretation of data; writing of   |     |
| 10 | funder               |                     | the report; and the decision to submit the         |     |
| 11 |                      |                     | report for publication, including whether they     |     |
| 12 |                      |                     | will have ultimate authority over any of these     |     |
| 13 |                      |                     | activities                                         |     |
| 14 |                      |                     |                                                    |     |
| 15 |                      |                     |                                                    |     |
| 16 |                      |                     |                                                    |     |
| 17 |                      |                     |                                                    |     |
| 18 |                      |                     |                                                    |     |
| 19 | Roles and            | <a href="#">#5d</a> | Composition, roles, and responsibilities of the    | 21  |
| 20 | responsibilities:    |                     | coordinating centre, steering committee,           |     |
| 21 | committees           |                     | endpoint adjudication committee, data              |     |
| 22 |                      |                     | management team, and other individuals or          |     |
| 23 |                      |                     | groups overseeing the trial, if applicable (see    |     |
| 24 |                      |                     | Item 21a for data monitoring committee)            |     |
| 25 |                      |                     |                                                    |     |
| 26 |                      |                     |                                                    |     |
| 27 |                      |                     |                                                    |     |
| 28 |                      |                     |                                                    |     |
| 29 | Background and       | <a href="#">#6a</a> | Description of research question and               | 6-7 |
| 30 | rationale            |                     | justification for undertaking the trial, including |     |
| 31 |                      |                     | summary of relevant studies (published and         |     |
| 32 |                      |                     | unpublished) examining benefits and harms          |     |
| 33 |                      |                     | for each intervention                              |     |
| 34 |                      |                     |                                                    |     |
| 35 |                      |                     |                                                    |     |
| 36 |                      |                     |                                                    |     |
| 37 | Background and       | <a href="#">#6b</a> | Explanation for choice of comparators              | 6-7 |
| 38 | rationale: choice of |                     |                                                    |     |
| 39 | comparators          |                     |                                                    |     |
| 40 |                      |                     |                                                    |     |
| 41 |                      |                     |                                                    |     |
| 42 | Objectives           | <a href="#">#7</a>  | Specific objectives or hypotheses                  | 7   |
| 43 |                      |                     |                                                    |     |
| 44 |                      |                     |                                                    |     |
| 45 | Trial design         | <a href="#">#8</a>  | Description of trial design including type of      | 9   |
| 46 |                      |                     | trial (eg, parallel group, crossover, factorial,   |     |
| 47 |                      |                     | single group), allocation ratio, and framework     |     |
| 48 |                      |                     | (eg, superiority, equivalence, non-inferiority,    |     |
| 49 |                      |                     | exploratory)                                       |     |
| 50 |                      |                     |                                                    |     |
| 51 |                      |                     |                                                    |     |
| 52 |                      |                     |                                                    |     |
| 53 | Study setting        | <a href="#">#9</a>  | Description of study settings (eg, community       | 21  |
| 54 |                      |                     | clinic, academic hospital) and list of countries   |     |
| 55 |                      |                     | where data will be collected. Reference to         |     |
| 56 |                      |                     | where list of study sites can be obtained          |     |
| 57 |                      |                     |                                                    |     |
| 58 |                      |                     |                                                    |     |
| 59 |                      |                     |                                                    |     |
| 60 |                      |                     |                                                    |     |

|    |                      |                      |                                                       |                      |
|----|----------------------|----------------------|-------------------------------------------------------|----------------------|
| 1  | Eligibility criteria | <a href="#">#10</a>  | Inclusion and exclusion criteria for                  | 9-10                 |
| 2  |                      |                      | participants. If applicable, eligibility criteria for |                      |
| 3  |                      |                      | study centres and individuals who will perform        |                      |
| 4  |                      |                      | the interventions (eg, surgeons,                      |                      |
| 5  |                      |                      | psychotherapists)                                     |                      |
| 6  |                      |                      |                                                       |                      |
| 7  |                      |                      |                                                       |                      |
| 8  |                      |                      |                                                       |                      |
| 9  | Interventions:       | <a href="#">#11a</a> | Interventions for each group with sufficient          | 10-11                |
| 10 | description          |                      | detail to allow replication, including how and        |                      |
| 11 |                      |                      | when they will be administered                        |                      |
| 12 |                      |                      |                                                       |                      |
| 13 |                      |                      |                                                       |                      |
| 14 | Interventions:       | <a href="#">#11b</a> | Criteria for discontinuing or modifying               | 11                   |
| 15 | modifications        |                      | allocated interventions for a given trial             |                      |
| 16 |                      |                      | participant (eg, drug dose change in response         |                      |
| 17 |                      |                      | to harms, participant request, or improving /         |                      |
| 18 |                      |                      | worsening disease)                                    |                      |
| 19 |                      |                      |                                                       |                      |
| 20 |                      |                      |                                                       |                      |
| 21 |                      |                      |                                                       |                      |
| 22 |                      |                      |                                                       |                      |
| 23 | Interventions:       | <a href="#">#11c</a> | Strategies to improve adherence to                    | n/a- ROMIO is a      |
| 24 | adherence            |                      | intervention protocols, and any procedures for        | pragmatic trial      |
| 25 |                      |                      | monitoring adherence (eg, drug tablet return;         |                      |
| 26 |                      |                      | laboratory tests)                                     |                      |
| 27 |                      |                      |                                                       |                      |
| 28 |                      |                      |                                                       |                      |
| 29 |                      |                      |                                                       |                      |
| 30 | Interventions:       | <a href="#">#11d</a> | Relevant concomitant care and interventions           | 10 (otherwise n/a as |
| 31 | concomitant care     |                      | that are permitted or prohibited during the trial     | ROMIO is a pragmatic |
| 32 |                      |                      |                                                       | trial)               |
| 33 |                      |                      |                                                       |                      |
| 34 |                      |                      |                                                       |                      |
| 35 | Outcomes             | <a href="#">#12</a>  | Primary, secondary, and other outcomes,               | 12-13                |
| 36 |                      |                      | including the specific measurement variable           |                      |
| 37 |                      |                      | (eg, systolic blood pressure), analysis metric        |                      |
| 38 |                      |                      | (eg, change from baseline, final value, time to       |                      |
| 39 |                      |                      | event), method of aggregation (eg, median,            |                      |
| 40 |                      |                      | proportion), and time point for each outcome.         |                      |
| 41 |                      |                      | Explanation of the clinical relevance of              |                      |
| 42 |                      |                      | chosen efficacy and harm outcomes is                  |                      |
| 43 |                      |                      | strongly recommended                                  |                      |
| 44 |                      |                      |                                                       |                      |
| 45 |                      |                      |                                                       |                      |
| 46 |                      |                      |                                                       |                      |
| 47 |                      |                      |                                                       |                      |
| 48 |                      |                      |                                                       |                      |
| 49 | Participant timeline | <a href="#">#13</a>  | Time schedule of enrolment, interventions             | 10, 12-13            |
| 50 |                      |                      | (including any run-ins and washouts),                 |                      |
| 51 |                      |                      | assessments, and visits for participants. A           |                      |
| 52 |                      |                      | schematic diagram is highly recommended               |                      |
| 53 |                      |                      | (see Figure)                                          |                      |
| 54 |                      |                      |                                                       |                      |
| 55 |                      |                      |                                                       |                      |
| 56 |                      |                      |                                                       |                      |
| 57 |                      |                      |                                                       |                      |
| 58 |                      |                      |                                                       |                      |
| 59 |                      |                      |                                                       |                      |
| 60 |                      |                      |                                                       |                      |

|    |                     |                      |                                                  |                        |
|----|---------------------|----------------------|--------------------------------------------------|------------------------|
| 1  | Sample size         | <a href="#">#14</a>  | Estimated number of participants needed to       | 14                     |
| 2  |                     |                      | achieve study objectives and how it was          |                        |
| 3  |                     |                      | determined, including clinical and statistical   |                        |
| 4  |                     |                      | assumptions supporting any sample size           |                        |
| 5  |                     |                      | calculations                                     |                        |
| 6  |                     |                      |                                                  |                        |
| 7  |                     |                      |                                                  |                        |
| 8  |                     |                      |                                                  |                        |
| 9  | Recruitment         | <a href="#">#15</a>  | Strategies for achieving adequate participant    | Not included here      |
| 10 |                     |                      | enrolment to reach target sample size            |                        |
| 11 |                     |                      |                                                  |                        |
| 12 |                     |                      |                                                  |                        |
| 13 | Allocation:         | <a href="#">#16a</a> | Method of generating the allocation sequence     | 10                     |
| 14 | sequence            |                      | (eg, computer-generated random numbers),         |                        |
| 15 | generation          |                      | and list of any factors for stratification. To   |                        |
| 16 |                     |                      | reduce predictability of a random sequence,      |                        |
| 17 |                     |                      | details of any planned restriction (eg,          |                        |
| 18 |                     |                      | blocking) should be provided in a separate       |                        |
| 19 |                     |                      | document that is unavailable to those who        |                        |
| 20 |                     |                      | enrol participants or assign interventions       |                        |
| 21 |                     |                      |                                                  |                        |
| 22 |                     |                      |                                                  |                        |
| 23 |                     |                      |                                                  |                        |
| 24 |                     |                      |                                                  |                        |
| 25 |                     |                      |                                                  |                        |
| 26 | Allocation          | <a href="#">#16b</a> | Mechanism of implementing the allocation         | 10                     |
| 27 | concealment         |                      | sequence (eg, central telephone; sequentially    |                        |
| 28 | mechanism           |                      | numbered, opaque, sealed envelopes),             |                        |
| 29 |                     |                      | describing any steps to conceal the sequence     |                        |
| 30 |                     |                      | until interventions are assigned                 |                        |
| 31 |                     |                      |                                                  |                        |
| 32 |                     |                      |                                                  |                        |
| 33 |                     |                      |                                                  |                        |
| 34 | Allocation:         | <a href="#">#16c</a> | Who will generate the allocation sequence,       | 10                     |
| 35 | implementation      |                      | who will enrol participants, and who will        |                        |
| 36 |                     |                      | assign participants to interventions             |                        |
| 37 |                     |                      |                                                  |                        |
| 38 |                     |                      |                                                  |                        |
| 39 | Blinding (masking)  | <a href="#">#17a</a> | Who will be blinded after assignment to          | 13                     |
| 40 |                     |                      | interventions (eg, trial participants, care      |                        |
| 41 |                     |                      | providers, outcome assessors, data analysts),    |                        |
| 42 |                     |                      | and how                                          |                        |
| 43 |                     |                      |                                                  |                        |
| 44 |                     |                      |                                                  |                        |
| 45 |                     |                      |                                                  |                        |
| 46 | Blinding (masking): | <a href="#">#17b</a> | If blinded, circumstances under which            | N/A –pathologists are  |
| 47 | emergency           |                      | unblinding is permissible, and procedure for     | blinded. Patients are  |
| 48 | unblinding          |                      | revealing a participant's allocated intervention | blinded until a week   |
| 49 |                     |                      | during the trial                                 | after surgery, success |
| 50 |                     |                      |                                                  | of patient blinding is |
| 51 |                     |                      |                                                  | assessed.              |
| 52 |                     |                      |                                                  |                        |
| 53 |                     |                      |                                                  |                        |
| 54 |                     |                      |                                                  |                        |
| 55 |                     |                      |                                                  |                        |
| 56 | Data collection     | <a href="#">#18a</a> | Plans for assessment and collection of           | 12-13                  |
| 57 | plan                |                      | outcome, baseline, and other trial data,         |                        |
| 58 |                     |                      |                                                  |                        |
| 59 |                     |                      |                                                  |                        |
| 60 |                     |                      |                                                  |                        |

including any related processes to promote data quality (eg, duplicate measurements, training of assessors) and a description of study instruments (eg, questionnaires, laboratory tests) along with their reliability and validity, if known. Reference to where data collection forms can be found, if not in the protocol

|    |                      |                      |                                                   |
|----|----------------------|----------------------|---------------------------------------------------|
| 1  |                      |                      |                                                   |
| 2  |                      |                      |                                                   |
| 3  |                      |                      |                                                   |
| 4  |                      |                      |                                                   |
| 5  |                      |                      |                                                   |
| 6  |                      |                      |                                                   |
| 7  |                      |                      |                                                   |
| 8  |                      |                      |                                                   |
| 9  |                      |                      |                                                   |
| 10 |                      |                      |                                                   |
| 11 |                      |                      |                                                   |
| 12 |                      |                      |                                                   |
| 13 | Data collection      | <a href="#">#18b</a> | Plans to promote participant retention and        |
| 14 | plan: retention      |                      | complete follow-up, including list of any         |
| 15 |                      |                      | outcome data to be collected for participants     |
| 16 |                      |                      | who discontinue or deviate from intervention      |
| 17 |                      |                      | protocols                                         |
| 18 |                      |                      |                                                   |
| 19 |                      |                      |                                                   |
| 20 |                      |                      |                                                   |
| 21 | Data management      | <a href="#">#19</a>  | Plans for data entry, coding, security, and       |
| 22 |                      |                      | storage, including any related processes to       |
| 23 |                      |                      | promote data quality (eg, double data entry;      |
| 24 |                      |                      | range checks for data values). Reference to       |
| 25 |                      |                      | where details of data management                  |
| 26 |                      |                      | procedures can be found, if not in the protocol   |
| 27 |                      |                      |                                                   |
| 28 |                      |                      |                                                   |
| 29 |                      |                      |                                                   |
| 30 |                      |                      |                                                   |
| 31 | Statistics:          | <a href="#">#20a</a> | Statistical methods for analysing primary and     |
| 32 | outcomes             |                      | secondary outcomes. Reference to where            |
| 33 |                      |                      | other details of the statistical analysis plan    |
| 34 |                      |                      | can be found, if not in the protocol              |
| 35 |                      |                      |                                                   |
| 36 |                      |                      |                                                   |
| 37 |                      |                      |                                                   |
| 38 | Statistics:          | <a href="#">#20b</a> | Methods for any additional analyses (eg,          |
| 39 | additional analyses  |                      | subgroup and adjusted analyses)                   |
| 40 |                      |                      |                                                   |
| 41 |                      |                      |                                                   |
| 42 | Statistics: analysis | <a href="#">#20c</a> | Definition of analysis population relating to     |
| 43 | population and       |                      | protocol non-adherence (eg, as randomised         |
| 44 | missing data         |                      | analysis), and any statistical methods to         |
| 45 |                      |                      | handle missing data (eg, multiple imputation)     |
| 46 |                      |                      |                                                   |
| 47 |                      |                      |                                                   |
| 48 | Data monitoring:     | <a href="#">#21a</a> | Composition of data monitoring committee          |
| 49 | formal committee     |                      | (DMC); summary of its role and reporting          |
| 50 |                      |                      | structure; statement of whether it is             |
| 51 |                      |                      | independent from the sponsor and competing        |
| 52 |                      |                      | interests; and reference to where further         |
| 53 |                      |                      | details about its charter can be found, if not in |
| 54 |                      |                      |                                                   |
| 55 |                      |                      |                                                   |
| 56 |                      |                      |                                                   |
| 57 |                      |                      |                                                   |
| 58 |                      |                      |                                                   |
| 59 |                      |                      |                                                   |
| 60 |                      |                      |                                                   |

|    |                                      |                                                                                                                                                                                                                                                        |                                   |
|----|--------------------------------------|--------------------------------------------------------------------------------------------------------------------------------------------------------------------------------------------------------------------------------------------------------|-----------------------------------|
|    |                                      | the protocol. Alternatively, an explanation of why a DMC is not needed                                                                                                                                                                                 |                                   |
| 1  |                                      |                                                                                                                                                                                                                                                        |                                   |
| 2  |                                      |                                                                                                                                                                                                                                                        |                                   |
| 3  |                                      |                                                                                                                                                                                                                                                        |                                   |
| 4  | Data monitoring:<br>interim analysis | <a href="#">#21b</a> Description of any interim analyses and stopping guidelines, including who will have access to these interim results and make the final decision to terminate the trial                                                           | n/a – no interim analyses planned |
| 5  |                                      |                                                                                                                                                                                                                                                        |                                   |
| 6  |                                      |                                                                                                                                                                                                                                                        |                                   |
| 7  |                                      |                                                                                                                                                                                                                                                        |                                   |
| 8  |                                      |                                                                                                                                                                                                                                                        |                                   |
| 9  |                                      |                                                                                                                                                                                                                                                        |                                   |
| 10 | Harms                                | <a href="#">#22</a> Plans for collecting, assessing, reporting, and managing solicited and spontaneously reported adverse events and other unintended effects of trial interventions or trial conduct                                                  | 14                                |
| 11 |                                      |                                                                                                                                                                                                                                                        |                                   |
| 12 |                                      |                                                                                                                                                                                                                                                        |                                   |
| 13 |                                      |                                                                                                                                                                                                                                                        |                                   |
| 14 |                                      |                                                                                                                                                                                                                                                        |                                   |
| 15 |                                      |                                                                                                                                                                                                                                                        |                                   |
| 16 |                                      |                                                                                                                                                                                                                                                        |                                   |
| 17 |                                      |                                                                                                                                                                                                                                                        |                                   |
| 18 |                                      |                                                                                                                                                                                                                                                        |                                   |
| 19 | Auditing                             | <a href="#">#23</a> Frequency and procedures for auditing trial conduct, if any, and whether the process will be independent from investigators and the sponsor                                                                                        | 11                                |
| 20 |                                      |                                                                                                                                                                                                                                                        |                                   |
| 21 |                                      |                                                                                                                                                                                                                                                        |                                   |
| 22 |                                      |                                                                                                                                                                                                                                                        |                                   |
| 23 |                                      |                                                                                                                                                                                                                                                        |                                   |
| 24 |                                      |                                                                                                                                                                                                                                                        |                                   |
| 25 |                                      |                                                                                                                                                                                                                                                        |                                   |
| 26 | Research ethics approval             | <a href="#">#24</a> Plans for seeking research ethics committee / institutional review board (REC / IRB) approval                                                                                                                                      | 17                                |
| 27 |                                      |                                                                                                                                                                                                                                                        |                                   |
| 28 |                                      |                                                                                                                                                                                                                                                        |                                   |
| 29 |                                      |                                                                                                                                                                                                                                                        |                                   |
| 30 |                                      |                                                                                                                                                                                                                                                        |                                   |
| 31 | Protocol amendments                  | <a href="#">#25</a> Plans for communicating important protocol modifications (eg, changes to eligibility criteria, outcomes, analyses) to relevant parties (eg, investigators, REC / IRBs, trial participants, trial registries, journals, regulators) | 17-18                             |
| 32 |                                      |                                                                                                                                                                                                                                                        |                                   |
| 33 |                                      |                                                                                                                                                                                                                                                        |                                   |
| 34 |                                      |                                                                                                                                                                                                                                                        |                                   |
| 35 |                                      |                                                                                                                                                                                                                                                        |                                   |
| 36 |                                      |                                                                                                                                                                                                                                                        |                                   |
| 37 |                                      |                                                                                                                                                                                                                                                        |                                   |
| 38 |                                      |                                                                                                                                                                                                                                                        |                                   |
| 39 |                                      |                                                                                                                                                                                                                                                        |                                   |
| 40 |                                      |                                                                                                                                                                                                                                                        |                                   |
| 41 | Consent or assent                    | <a href="#">#26a</a> Who will obtain informed consent or assent from potential trial participants or authorised surrogates, and how (see Item 32)                                                                                                      | 10                                |
| 42 |                                      |                                                                                                                                                                                                                                                        |                                   |
| 43 |                                      |                                                                                                                                                                                                                                                        |                                   |
| 44 |                                      |                                                                                                                                                                                                                                                        |                                   |
| 45 |                                      |                                                                                                                                                                                                                                                        |                                   |
| 46 | Consent or assent: ancillary studies | <a href="#">#26b</a> Additional consent provisions for collection and use of participant data and biological specimens in ancillary studies, if applicable                                                                                             | n/a                               |
| 47 |                                      |                                                                                                                                                                                                                                                        |                                   |
| 48 |                                      |                                                                                                                                                                                                                                                        |                                   |
| 49 |                                      |                                                                                                                                                                                                                                                        |                                   |
| 50 |                                      |                                                                                                                                                                                                                                                        |                                   |
| 51 | Confidentiality                      | <a href="#">#27</a> How personal information about potential and enrolled participants will be collected, shared, and maintained in order to protect confidentiality before, during, and after the trial                                               | 21                                |
| 52 |                                      |                                                                                                                                                                                                                                                        |                                   |
| 53 |                                      |                                                                                                                                                                                                                                                        |                                   |
| 54 |                                      |                                                                                                                                                                                                                                                        |                                   |
| 55 |                                      |                                                                                                                                                                                                                                                        |                                   |
| 56 |                                      |                                                                                                                                                                                                                                                        |                                   |
| 57 |                                      |                                                                                                                                                                                                                                                        |                                   |
| 58 |                                      |                                                                                                                                                                                                                                                        |                                   |
| 59 |                                      |                                                                                                                                                                                                                                                        |                                   |
| 60 |                                      |                                                                                                                                                                                                                                                        |                                   |



|    |                       |                      |                                                   |                         |
|----|-----------------------|----------------------|---------------------------------------------------|-------------------------|
| 1  | Declaration of        | <a href="#">#28</a>  | Financial and other competing interests for       | 22                      |
| 2  | interests             |                      | principal investigators for the overall trial and |                         |
| 3  |                       |                      | each study site                                   |                         |
| 4  |                       |                      |                                                   |                         |
| 5  |                       |                      |                                                   |                         |
| 6  | Data access           | <a href="#">#29</a>  | Statement of who will have access to the final    | 22                      |
| 7  |                       |                      | trial dataset, and disclosure of contractual      |                         |
| 8  |                       |                      | agreements that limit such access for             |                         |
| 9  |                       |                      | investigators                                     |                         |
| 10 |                       |                      |                                                   |                         |
| 11 |                       |                      |                                                   |                         |
| 12 |                       |                      |                                                   |                         |
| 13 | Ancillary and post    | <a href="#">#30</a>  | Provisions, if any, for ancillary and post-trial  | N/A                     |
| 14 | trial care            |                      | care, and for compensation to those who           |                         |
| 15 |                       |                      | suffer harm from trial participation              |                         |
| 16 |                       |                      |                                                   |                         |
| 17 |                       |                      |                                                   |                         |
| 18 | Dissemination         | <a href="#">#31a</a> | Plans for investigators and sponsor to            | 17                      |
| 19 | policy: trial results |                      | communicate trial results to participants,        |                         |
| 20 |                       |                      | healthcare professionals, the public, and         |                         |
| 21 |                       |                      | other relevant groups (eg, via publication,       |                         |
| 22 |                       |                      | reporting in results databases, or other data     |                         |
| 23 |                       |                      | sharing arrangements), including any              |                         |
| 24 |                       |                      | publication restrictions                          |                         |
| 25 |                       |                      |                                                   |                         |
| 26 |                       |                      |                                                   |                         |
| 27 |                       |                      |                                                   |                         |
| 28 |                       |                      |                                                   |                         |
| 29 |                       |                      |                                                   |                         |
| 30 | Dissemination         | <a href="#">#31b</a> | Authorship eligibility guidelines and any         | n/a                     |
| 31 | policy: authorship    |                      | intended use of professional writers              |                         |
| 32 |                       |                      |                                                   |                         |
| 33 |                       |                      |                                                   |                         |
| 34 | Dissemination         | <a href="#">#31c</a> | Plans, if any, for granting public access to the  | The protocol is         |
| 35 | policy:               |                      | full protocol, participant-level dataset, and     | publically available on |
| 36 | reproducible          |                      | statistical code                                  | the NIHR website        |
| 37 | research              |                      |                                                   |                         |
| 38 |                       |                      |                                                   |                         |
| 39 |                       |                      |                                                   |                         |
| 40 | Informed consent      | <a href="#">#32</a>  | Model consent form and other related              | Available on request    |
| 41 | materials             |                      | documentation given to participants and           |                         |
| 42 |                       |                      | authorised surrogates                             |                         |
| 43 |                       |                      |                                                   |                         |
| 44 |                       |                      |                                                   |                         |
| 45 |                       |                      |                                                   |                         |
| 46 | Biological            | <a href="#">#33</a>  | Plans for collection, laboratory evaluation,      | N/A                     |
| 47 | specimens             |                      | and storage of biological specimens for           |                         |
| 48 |                       |                      | genetic or molecular analysis in the current      |                         |
| 49 |                       |                      | trial and for future use in ancillary studies, if |                         |
| 50 |                       |                      | applicable                                        |                         |
| 51 |                       |                      |                                                   |                         |
| 52 |                       |                      |                                                   |                         |
| 53 |                       |                      |                                                   |                         |

The SPIRIT checklist is distributed under the terms of the Creative Commons Attribution License CC-BY-ND 3.0. This checklist can be completed online using <https://www.goodreports.org/>, a tool made by the [EQUATOR Network](#) in collaboration with [Penelope.ai](#)
